1 **Defining Inflammatory Cell States in Rheumatoid Arthritis Joint Synovial Tissues by**  
2 **Integrating Single-cell Transcriptomics and Mass Cytometry**

3  
4 Fan Zhang<sup>1,2,3,4,5,Λ</sup>, Kevin Wei<sup>5,Λ</sup>, Kamil Slowikowski<sup>1,2,3,4,5,Λ</sup>, Chamith Y. Fonseka<sup>1,2,3,4,5,Λ</sup>,  
5 Deepak A. Rao<sup>5,Λ</sup>, Stephen Kelly<sup>6</sup>, Susan M. Goodman<sup>7,8</sup>, Darren Tabechian<sup>9</sup>, Laura B.  
6 Hughes<sup>10</sup>, Karen Salomon-Escoto<sup>11</sup>, Gerald F. M. Watts<sup>5</sup>, William Apruzzese<sup>5</sup>, David J. Lieb<sup>4</sup>,  
7 David L. Boyle<sup>12</sup>, Arthur M. Mandelin II<sup>13</sup>, Accelerating Medicines Partnership: RA Phase 1<sup>14</sup>,  
8 AMP RA/SLE, Brendan F. Boyce<sup>15</sup>, Edward DiCarlo<sup>8,16</sup>, Ellen M. Gravallesse<sup>11</sup>, Peter K.  
9 Gregersen<sup>17</sup>, Larry Moreland<sup>18</sup>, Gary S. Firestein<sup>12</sup>, Nir Hacohen<sup>4</sup>, Chad Nusbaum<sup>4</sup>, James A.  
10 Lederer<sup>19</sup>, Harris Perlman<sup>13</sup>, Costantino Pitzalis<sup>20</sup>, Andrew Filer<sup>21,22</sup>, V. Michael Holers<sup>23</sup>, Vivian  
11 P. Bykerk<sup>7,8</sup>, Laura T. Donlin<sup>8,24,\*</sup>, Jennifer H. Anolik<sup>9,25,\*</sup>, Michael B. Brenner<sup>5,\*</sup>, Soumya  
12 Raychaudhuri<sup>1,2,3,4,5,26,\*</sup>

13  
14 <sup>1</sup>Center for Data Sciences, Brigham and Women's Hospital, Boston, MA 02115, USA

15 <sup>2</sup>Division of Rheumatology and Genetics, Department of Medicine, Brigham and Women's  
16 Hospital, Boston, MA 02115, USA

17 <sup>3</sup>Department of Biomedical Informatics, Harvard Medical School, Boston, MA 02115 USA

18 <sup>4</sup>Broad Institute of Massachusetts Institute and Technology and Harvard University, Cambridge,  
19 MA 02142, USA

20 <sup>5</sup>Division of Rheumatology, Immunology, Allergy, Brigham and Women's Hospital and Harvard  
21 Medical School, MA 02115, USA

22 <sup>6</sup>Department of Rheumatology, Barts Health NHS Trust, London, E1 1BB, UK

23 <sup>7</sup>Division of Rheumatology, Hospital for Special Surgery, New York, NY 10021, USA

24 <sup>8</sup>Department of Medicine, Weill Cornell Medical College, New York, NY 10065, USA

25 <sup>9</sup>Division of Allergy, Immunology and Rheumatology, Department of Medicine, University of  
26 Rochester Medical Center, Rochester, NY 14642, USA

27 <sup>10</sup>Division of Clinical Immunology and Rheumatology, Department of Medicine, University of  
28 Alabama at Birmingham, Birmingham, AL 35294-2182, USA

29 <sup>11</sup>Division of Rheumatology, Department of Medicine, University of Massachusetts Medical  
30 School, Worcester, MA 01605, USA

31 <sup>12</sup>Department of Medicine, Division of Rheumatology, Allergy and Immunology, University of  
32 California, San Diego, La Jolla, CA 92093 USA

33 <sup>13</sup>Division of Rheumatology, Department of Medicine, Northwestern University Feinberg School  
34 of Medicine. Chicago, IL 60611, USA

35 <sup>14</sup>AMP RA Phase 1: full list of members and affiliations appears in the end of the paper

36 <sup>15</sup>Department of Pathology and Laboratory Medicine, University of Rochester Medical Center,  
37 Rochester, NY 14642, USA

38 <sup>16</sup>Department of Pathology and Laboratory Medicine, Hospital for Special Surgery, New York,  
39 NY 10021, USA

40 <sup>17</sup>Feinstein Institute for Medical Research, Northwell Health, Manhasset, New York, NY 11030,  
41 USA

42 <sup>18</sup>Division of Rheumatology and Clinical Immunology, University of Pittsburgh School of  
43 Medicine, Pittsburgh, PA 15261 USA

44 <sup>19</sup>Department of Surgery, Brigham and Women's Hospital and Harvard Medical School, MA  
45 02115, USA

46 <sup>20</sup>Centre for Experimental Medicine & Rheumatology, William Harvey Research Institute, Queen  
47 Mary University of London, E1 4NS, UK

48 <sup>21</sup>Rheumatology Research Group, Institute of Inflammation and Ageing, The University of  
49 Birmingham, Birmingham, B15 2WB, UK

50 <sup>22</sup>University Hospitals Birmingham NHS Foundation Trust, Birmingham, B15 2TH, UK

51 <sup>23</sup>Division of Rheumatology, University of Colorado School of Medicine, Aurora, CO 80220, USA

52 <sup>24</sup>Arthritis and Tissue Degeneration, Hospital for Special Surgery, New York, NY 10021, USA

53 <sup>25</sup>Center for Musculoskeletal Research, University of Rochester Medical Center, Rochester, NY  
54 14642, USA

55 <sup>26</sup>Arthritis Research UK Centre for Genetics and Genomics, Centre for Musculoskeletal  
56 Research, The University of Manchester, Oxford Road, Manchester, M13 9PT, UK

57

58 ^Co-first authors

59 \*Co-senior authors

60 Correspondence and requests for materials should be addressed to

61 Soumya Raychaudhuri

62 77 Avenue Louis Pasteur

63 Harvard New Research Building, Suite 250D

64 Boston, MA 02446, USA.

65 [soumya@broadinstitute.org](mailto:soumya@broadinstitute.org); 617-525-4484 (tel); 617-525-4488 (fax)

66

67

68

69

70

71

72

73

74

75

76

77

78 **Abstract**

79 To define the cell populations in rheumatoid arthritis (RA) driving joint inflammation, we applied  
80 single-cell RNA-seq (scRNA-seq), mass cytometry, bulk RNA-seq, and flow cytometry to sorted  
81 T cells, B cells, monocytes, and fibroblasts from 51 synovial tissue RA and osteoarthritis (OA)  
82 patient samples. Utilizing an integrated computational strategy based on canonical correlation  
83 analysis to 5,452 scRNA-seq profiles, we identified 18 unique cell populations. Combining mass  
84 cytometry and transcriptomics together revealed cell states expanded in RA synovia:  
85 *THY1<sup>+</sup>HLA<sup>high</sup>* sublining fibroblasts (OR=33.8), *IL1B<sup>+</sup>* pro-inflammatory monocytes (OR=7.8),  
86 *CD11c<sup>+</sup>T-bet<sup>+</sup>* autoimmune-associated B cells (OR=5.7), and *PD-1<sup>+</sup>* Tph/Tfh (OR=3.0). We also  
87 defined CD8<sup>+</sup> T cell subsets characterized by *GZMK<sup>+</sup>*, *GZMB<sup>+</sup>*, and *GNLY<sup>+</sup>* expression. Using  
88 bulk and single-cell data, we mapped inflammatory mediators to source cell populations, for  
89 example attributing *IL6* production to *THY1<sup>+</sup>HLA<sup>high</sup>* fibroblasts and naïve B cells, and *IL1B* to  
90 pro-inflammatory monocytes. These populations are potentially key mediators of RA  
91 pathogenesis.

92

93

94

95

96

97

98

99

100

101 Rheumatoid arthritis (RA) is an autoimmune disease affecting up to 1% of the population  
102 where a complex interplay between many different cell types drives chronic inflammation in the  
103 synovium of the joint tissue<sup>1-3</sup>. This inflammation leads to joint destruction, disability and  
104 shortened life span<sup>4</sup>. Defining key cellular subsets and their activation states in RA has been a  
105 longstanding key step to defining new therapeutic targets. CD4<sup>+</sup> T cell subsets<sup>5,6</sup>, B cells<sup>7</sup>,  
106 monocytes<sup>8,9</sup>, and fibroblasts<sup>10-12</sup> have established relevance to RA pathogenesis. A global  
107 portrait of RA-relevant cell subsets using single cell technologies across a large sample  
108 collection tissues from inflamed joints is a critical resource for advancing therapeutics.

109 Application of transcriptomic and cellular profiling technologies to whole synovial tissue  
110 has already identified promising specific cellular populations associated with RA<sup>3,13-15</sup>. However,  
111 most studies have focused on a pre-selected cell type, surveyed whole tissues rather than  
112 disaggregated cells, or used only one technology. Latest advances in single-cell technologies  
113 offer an opportunity to identify disease-associated cell subsets in human tissues at high  
114 resolution in an unbiased fashion<sup>16-19</sup>. These technologies have already indicated roles for T  
115 peripheral helper (Tph) cells<sup>20</sup> and HLA-DR<sup>+</sup>CD27<sup>-</sup> cytotoxic T cells<sup>21</sup> in RA pathogenesis.  
116 Separately, scRNA-seq has defined myeloid cell heterogeneity in human blood<sup>22</sup> and identified  
117 a distinct subset of PDPN<sup>+</sup>CD34<sup>-</sup>THY1<sup>+</sup> (THY1, also known as CD90) fibroblasts enriched in RA  
118 synovial tissue<sup>16,23</sup>.

119 To generate high-dimensional multi-modal single-cell data from synovial tissue samples,  
120 we developed a robust tissue analytical pipeline<sup>24</sup> in the Accelerating Medicines Partnership  
121 (AMP) RA/SLE consortium. We collected and disaggregated tissue samples from patients with  
122 RA and OA, and then subjected constituent cells to scRNA-seq, sorted-population bulk RNA-  
123 seq, mass cytometry, and flow cytometry. We developed a robust computational strategy based  
124 on canonical correlation analysis (CCA) to integrate multi-modal transcriptomic and proteomic  
125 profiles at a single cell level. A unified analysis of single cells across data modalities can

126 precisely define contributions of specific cell subsets to pathways relevant to RA and chronic  
127 inflammation.

128

## 129 **RESULTS**

### 130 **Generation of parallel mass cytometric and transcriptomic data from synovial tissue**

131 In phase 1 of AMP-RA/SLE, we recruited 36 RA patients meeting 1987 ACR classification  
132 criteria and 15 OA control patients from 10 clinical sites over 16 months (**Supplemental Table**  
133 **1**) and obtained synovial tissues from ultrasound guided synovial biopsies or joint replacements  
134 (**Methods**). All tissue samples included had with synovial lining documented by histology (**Fig.**  
135 **1a**). Synovial tissue disaggregation yielded many viable cells (362,190 cells per tissue, S.E.M  
136 7,687 cells) for downstream analyses. Applying a previously validated strategy for synovial cell  
137 sorting<sup>24</sup> (**Fig. 1a**), we separated cells into B cells (CD45<sup>+</sup>CD3<sup>-</sup>CD19<sup>+</sup>), T cells (CD45<sup>+</sup>CD3<sup>+</sup>),  
138 monocytes (CD45<sup>+</sup>CD14<sup>+</sup>), and stromal fibroblasts (CD45<sup>-</sup>PDPN<sup>+</sup>) (**Supplemental Fig. 1a**). We  
139 applied bulk RNA-seq to all four sorted subsets from the 51 samples. For a subset of samples  
140 with sufficient cell yield (**Methods**), we measured single-cell protein expression using a 34-  
141 marker mass cytometry panel (n=26, **Supplemental Table 2**), and single-cell RNA expression  
142 in sorted populations (n=21, **Fig. 1b**).

143

### 144 **Summary of computational data integration strategy to define cell populations**

145 To confidently define RA associated cell populations, we used bulk RNA-seq data as the  
146 reference point for our study (**Fig. 1c**). Bulk RNA-seq data were available for almost all of the  
147 samples, had the highest dimensionality and least sparsity, and were the least sensitive to  
148 technical artifacts.

149 We used CCA to integrate bulk RNA-seq data with the three other datasets (**Fig. 1c**).  
150 Integrating scRNA-seq with bulk RNA-seq data ensures robust discovery of individual cellular  
151 populations. Here, we used CCA to find linear combinations of bulk RNA-seq samples and  
152 scRNA-seq cells (**Fig. 1d**) to create gene expression profiles that were maximally correlated.  
153 These linear combinations captured sources of shared variation between the two datasets and  
154 allowed us to identify individual cellular populations that drive variation in the bulk RNA-seq  
155 data. We clustered scRNA-seq data by using the most correlated canonical variates for each  
156 cell to compute a nearest neighbor network, and then identified clusters with a community  
157 detection algorithm (**Methods, Supplemental Fig. 2a**).

158 We identified clusters of cells in mass cytometry data using density-based clustering<sup>25</sup>.  
159 To define the genes that best correspond to the mass cytometry clusters, we integrated bulk  
160 RNA-seq with mass cytometry using CCA. In this analysis, CCA identifies linear combinations of  
161 genes and mass cytometry cluster proportions so that correlation across individual samples is  
162 maximized. These canonical variates offer a way to visualize genes and mass cytometry  
163 clusters together and define genes possibly specific for individual clusters. We then integrated  
164 mass cytometry clusters with identified scRNA-seq clusters to define the relationship between  
165 them (**Methods**). We also associated bulk gene expression in each sample with proportions of  
166 cells in different flow cytometry gate by integrating bulk RNA-seq with flow cytometry data using  
167 CCA.

168

### 169 **Disease association test of cellular populations**

170 We tested whether abundances of individual populations were altered in RA case samples  
171 compared to controls using two ways. First, we assessed whether marker genes ( $AUC > 0.7$ ,  $20$   
172  $< n < 100$ ) of each scRNA-seq derived cluster was differentially expressed concordantly in bulk

173 RNA-seq samples. Second, we applied MASC<sup>21</sup>, a single cell association testing framework, to  
174 identify mass cytometry clusters associated with disease (**Methods**).

175

## 176 **Synovial lymphocyte and monocyte infiltration distinguishes leukocyte-rich RA synovia**

177 Histology of RA synovial tissues revealed heterogeneous tissue composition with variable

178 lymphocyte and monocyte infiltration (**Fig. 2a,b**); in contrast OA tissues had minimal

179 lymphocytic infiltration (**Fig. 2a**). This expected heterogeneity reflects variable disease activity

180 among RA patients which results in differences in tissue immune cell infiltration<sup>26</sup>.

181 Consequently, we employed a data-driven approach to separate samples based on the degrees

182 of lymphocyte and monocyte infiltration of tissues measured by flow cytometry (**Supplemental**

183 **Fig. 1b,c**). We calculated a multivariate normal distribution of these parameters based on OA

184 samples as a reference, and then for each RA sample calculated the Mahalanobis distance

185 from OA<sup>27</sup>. We defined the maximum OA value (4.5) as a threshold to separate all leukocyte-

186 rich RA samples from leukocyte-poor samples (**Methods, Supplemental Fig. 1d**). We defined

187 19 leukocyte-rich RA and 17 leukocyte-poor RA samples in our cohort. Whereas leukocyte-rich

188 RA tissues had marked infiltration of synovial T cells and B cells (**Fig. 2c**), leukocyte-poor RA

189 tissues had a similar cellular composition of leukocytes and stromal fibroblasts as OA (**Fig. 2c**).

190 Synovial monocytes were similar between RA and OA (**Fig. 2c**).

191 Mass cytometry in 26 synovial tissues was consistent with flow cytometric and histologic

192 analyses. We observed marked differences in synovial cellular composition between leukocyte-

193 rich RA, leukocyte-poor RA, and OA. Stromal fibroblasts and endothelial cells constituted most

194 synovial cells in OA and leukocyte-poor RA and are otherwise characterized by expansion of

195 monocytes with few lymphocytes (**Fig. 2f, Supplemental Fig. 3**). In stark contrast, leukocyte-

196 rich RA tissues constituted predominantly of CD4 T, CD8 T, and B cells (**Fig. 2f**).



197 To validate whether our classification indicated inflammation, we assessed tissue  
198 histology and assigned a Krenn inflammation score<sup>28</sup>. We observed that leukocyte-rich RA  
199 samples exhibited significantly higher score than leukocyte-poor RA and OA (**Fig. 2d**). In  
200 contrast, synovial lining membrane hyperplasia was not significantly different between  
201 leukocyte-rich RA, leukocyte-poor RA, and OA controls. We observed significant correlation  
202 between synovial lymphocyte infiltration and histologic inflammation score (*t*-test  $p=5e-04$ ;  
203 Spearman's  $\rho = 0.55$ , **Fig. 2e**), suggesting consistent classification between cytometric and  
204 histologic assessments.

205

### 206 **Single-cell RNA-seq analysis reveals distinct cell subpopulations**

207 Next, we analyzed 5,265 scRNA-seq profiles passing stringent quality control, including  
208 1,142 B cells, 1,844 fibroblasts, 750 monocytes, and 1,529 T cells (**Methods**). We used  
209 canonical variates (from bulk RNA-seq integration) to define clusters that were independent of  
210 donor and sequencing batch effects (**Fig. 3a-b**, **Supplemental Fig. 2b,c**). In contrast,  
211 conventional PCA-based clustering led to clusters that were confounded by batch effects  
212 (**Supplemental Fig. 2d,e**). We selected marker genes for scRNA-seq clusters by comparing  
213 cells within it to cells outside it and applied the following criteria: 1) percent of non-zero  
214 expressing cells > 60%; 2) AUC score > 0.7; and 3) FC > 2 (**Supplemental Table 4**). CCA-  
215 based clustering identified 18 clusters (4 fibroblast clusters, 4 monocyte clusters, 6 T cell  
216 clusters, and 4 B cell clusters) from 21 donors (**Fig. 3a**, interactive form at  
217 <https://immunogenomics.io/amp/>). The distribution of these distinct clusters varies between  
218 donors, suggesting heterogeneity in immune and stromal cell subsets across patients (**Fig. 3b**).  
219 We show typical markers for cells in a t-Distributed Stochastic Neighbor Embedding (tSNE<sup>29</sup>)  
220 into two-dimensional space (**Fig. 3c-f**). Here we briefly summarize these populations.

221 Within stromal fibroblasts, we identified four putative cell subpopulations (**Fig. 3c**). The  
222 *CD55*<sup>+</sup> (SC-F4) cluster represented lining fibroblasts and were the most different from the other  
223 fibroblast clusters<sup>16,23</sup>. The other three fibroblast clusters were *CD34*<sup>+</sup> sublining fibroblasts (SC-  
224 F1), *HLA*<sup>high</sup> sublining fibroblasts (SC-F2), and *DKK3*<sup>+</sup> sublining fibroblasts (SC-F3). In  
225 monocytes (**Fig. 3d**), we identified *IL1B*<sup>+</sup> pro-inflammatory monocytes (SC-M1), *NUPR1*<sup>+</sup>  
226 monocytes (SC-M2), *C1QA*<sup>+</sup> monocytes (SC-M3), and IFN-activated monocytes (SC-M4). In T  
227 cells (**Fig. 3e**), we identified three *CD4*<sup>+</sup> clusters: *CCR7*<sup>+</sup>*CD4*<sup>+</sup> T cells (SC-T1), *FOXP3*<sup>+</sup> Tregs  
228 (SC-T2), and *PD-1*<sup>+</sup> Tph/Tfh (SC-T3). We also found three *CD8*<sup>+</sup> clusters: *GZMK*<sup>+</sup> T cells (SC-  
229 T4), *GNLY*<sup>+</sup>*GZMB*<sup>+</sup> cytotoxic lymphocytes (CTLs) (SC-T5), and *GZMK*<sup>+</sup>/*GZMB*<sup>+</sup> T cells (SC-T6).  
230 Within B cells (**Fig. 3f**), we identified four cell clusters, including naive *IGHD*<sup>+</sup>*CD27*<sup>-</sup> (SC-B1)  
231 and *IGHG3*<sup>+</sup>*CD27*<sup>-</sup> memory B cells (SC-B2). Intriguingly, we identified an autoimmune-  
232 associated B cell (ABC) cluster (SC-B3) with high expression of *ITGAX* (*CD11c*)<sup>30,31</sup>. We also  
233 identified a plasmablast cluster (SC-B4) with high expression of *IgG* genes and *XBP1*, a  
234 transcription factor critical for plasma cell differentiation<sup>32</sup>.

235

### 236 **Distinct synovial fibroblasts defined by cytokine activation and MHC II expression**

237 In synovial fibroblasts, differential single cell gene expression suggested that *CD55*<sup>+</sup>  
238 fibroblasts (SC-F4) were the most transcriptionally distinct subset from the three sublining  
239 *THY1*<sup>+</sup> clusters SC-F1, SC-F2, and SC-F3, indicating that anatomical localization contributes to  
240 synovial fibroblast diversity<sup>16,23</sup> (**Fig. 4a**). Consistent with the role of synovial fibroblasts in matrix  
241 remodeling, the three sublining fibroblasts, *CD34*<sup>+</sup> fibroblasts (SC-F1), *HLA*<sup>high</sup> fibroblasts (SC-  
242 F2), and *DKK3*<sup>+</sup> fibroblasts (SC-F3) share gene expression in pathways related to extracellular  
243 matrix constituents by gene set enrichment analysis (GSEA) (**Fig. 4a,b**). *HLA*<sup>high</sup> sublining  
244 fibroblasts (SC-F2) are enriched with genes related to MHC class II presentation (*HLA-DRA* and  
245 *HLA-DRB1*) and the interferon gamma-mediated signaling pathway (*IFI30*) (**Fig. 4a,b**),

246 suggesting upregulation of MHC class II in response to interferon-gamma signaling in these  
247 cells. We identified a novel sublining fibroblast subtype (SC-F3) that is characterized by high  
248 expression of *DKK3*, *CADM1* and *COL8A2*.

249 To identify fibroblast populations expanded in leukocyte-rich RA synovia, we first  
250 examined expression of genes associated with each fibroblast subsets from bulk-sorted  
251 fibroblasts (CD45<sup>-</sup>PDPN<sup>+</sup>) from RA and OA patients. Expression of genes associated with  
252 *HLA<sup>high</sup>* fibroblasts (*HLA-DRA*, *IRF1*, *ACTA2*, and *CXCL12*, *t*-test  $p < 1e-3$ ) were upregulated in  
253 leukocyte-rich RA (n=16) compared to OA (n=12) by bulk RNA-seq (**Fig. 4c**), suggesting  
254 expansion of SC-F2. Genes associated with SC-F4 lining fibroblasts (*PRG4*, *CD55*, *HTRA1*,  
255 and *DNASE1L3*, *t*-test  $p < 1e-3$ ) were significantly decreased in leukocyte-rich RA (**Fig. 4c**).  
256 Next, we used the most differentially expressed genes (AUC>0.7) in each fibroblast subset to  
257 query transcriptomic profiles of bulk-sorted fibroblasts from leukocyte-rich RA and OA synovia.  
258 *HLA<sup>high</sup>* sublining fibroblasts (SC-F2) and *CD34<sup>+</sup>* sublining fibroblasts (SC-F1) were significantly  
259 expanded in RA synovia compared to OA (*t*-test  $p = 2.5e-6$  and  $p = 2.1e-3$ , respectively), while  
260 *CD55<sup>+</sup>* lining fibroblasts (SC-F4) were relatively decreased in leukocyte-rich RA (*t*-test  $p = 5.0e-7$ )  
261 (**Fig. 4d**).

262 We then queried the proteomic expression to validate these four fibroblast populations.  
263 Analysis of CD45<sup>-</sup>PDPN<sup>+</sup> cells identified eight putative cell clusters based on the differential  
264 expression pattern of THY1, HLA-DR, CD34, and Cadherin11 (**Fig. 4e-g**) that were not  
265 confounded by obvious batch effects (**Supplemental Fig. 4a**). Integration of mass cytometry  
266 clusters with bulk RNA-seq using CCA showed that the *IL6*, *CXCL12*, and *HLA* gene expression  
267 is highly associated with frequency of THY1<sup>+</sup>CD34<sup>-</sup>HLA-DR<sup>high</sup> fibroblasts, suggesting an active  
268 cytokine-producing state (**Fig. 4h**). In contrast, the expression of lining fibroblast genes *PRG4*  
269 and *CD55* separated in the CCA space with a gradient, indicating relative decreased number of  
270 lining fibroblasts in leukocyte-rich synovium (**Fig. 4h**). We then integrated each scRNA-seq  
271 subset based on the most unique genes (AUC>0.7) with identified the corresponding mass

272 cytometry clusters and determined the statistical significance (z-score) of this association by  
273 explicit permutation (**Fig. 4i, Methods**). We consistently observed that *HLA<sup>high</sup>* sublining  
274 fibroblasts (SC-F2) are strongly associated (z-score=2.8) with *THY1<sup>+</sup>CD34<sup>-</sup>HLA-DR<sup>high</sup>*  
275 fibroblasts, and *CD34<sup>+</sup>* sublining fibroblasts (SC-F1) are strongly correlated (z-score=2.7) with  
276 *THY1<sup>+</sup>CD34<sup>+</sup>HLA-DR<sup>low</sup>* fibroblasts (**Fig. 4h, Table 1**) indicating that these populations  
277 correspond to each other.

278 Consistent with the differential expression analyses, we found that *THY1<sup>+</sup>CD34<sup>-</sup>HLA-*  
279 *DR<sup>high</sup>* cells are dramatically overabundant in leukocyte-rich RA compared to leukocyte-poor RA  
280 and OA controls (36% versus 2% of fibroblasts, MASC OR = 33.8 (95% CI: 11.7-113.1), one  
281 tailed MASC p=1.9e-05) (**Table 1**).

282

### 283 **Unique activation states define heterogeneity among synovial monocytes**

284 With scRNA-seq, we defined four transcriptionally distinct monocyte subsets: *IL1B<sup>+</sup>* pro-  
285 inflammatory monocytes (SC-M1), *NUPR1<sup>+</sup>* monocytes (SC-M2), *C1QA<sup>+</sup>* monocytes (SC-M3)  
286 and IFN-activated monocytes (SC-M4) (**Fig. 5a**). GSEA demonstrated that monocyte LPS  
287 response was associated with SC-M1 (44.8% of total monocytes) (**Fig. 5b**), suggesting it  
288 represents a phenotype similar to IL-1- or TLR-activated proinflammatory monocytes. Using  
289 Gene Ontology gene sets, we observed that SC-M4 monocytes were highly enriched in the type  
290 I interferon signaling and the interferon-gamma mediated pathway (**Supplemental Fig. 5a**),  
291 including increased expression of *IFITM3<sup>22</sup>* and *IFI6* (**Fig. 5a**). The phenotypes of the  
292 monocytes from SC-M2 and SC-M3 clusters do not align well with known activation states,  
293 possibly indicating a more homeostatic role in the synovium.

294 By querying bulk RNA-seq monocyte samples from leukocyte-rich RA (n=17) and OA  
295 samples (n=13), we found that genes associated with *IL1B<sup>+</sup>* monocytes (SC-M1), including  
296 *NR4A2* (t-test p=2.2e-05), *HBEGF* (t-test p=1.2e-4), *PLAUR* (t-test p=1.5e-4) and the IFN-

297 activated monocytes gene *IFITM3* ( $t$ -test  $p=9.3e-05$ ) were significantly upregulated in leukocyte-  
298 rich RA samples. In contrast, marker genes associated with *NUPR1*<sup>+</sup> monocytes (SC-M2) were  
299 relatively depleted in leukocyte-rich RA (**Fig. 5c**). Extensive examination of the top differentially  
300 expressed genes (AUC>0.7) for each monocyte subset confirmed a significant enrichment of  
301 *IL1B*<sup>+</sup> monocytes ( $t$ -test  $p=6.1e-5$ ) and IFN-activated monocytes ( $t$ -test  $p=6.2e-3$ ) in leukocyte-  
302 rich RA synovia in contrast to a relative depletion of *NUPR1*<sup>+</sup> monocytes ( $t$ -test  $p=2.2e-5$ ) (**Fig.**  
303 **5d**). These data indicate that cytokine activation drives the expansion of unique monocyte  
304 populations in active RA synovia.

305 Mass cytometry identified five synovial CD14<sup>+</sup> monocyte clusters (CD45<sup>+</sup>CD3<sup>-</sup>) (**Fig. 5e-**  
306 **g**) without obvious batch effects (**Supplemental Fig. 4b**). A CCA-based integration of mass  
307 cytometry and bulk RNA-seq data indicated that monocyte genes enriched in RA subsets, such  
308 as *IFITM3*, *PLAUR*, *CD38*, and *HLA* genes, are associated with CD11c<sup>+</sup>CCR2<sup>+</sup> and  
309 CD11c<sup>+</sup>CD38<sup>+</sup> mass cytometry clusters (**Fig. 5h**). These markers may define inflammatory  
310 synovial monocyte populations. We further associated proteomic expression of monocytes with  
311 distinct scRNA-seq clusters based on marker genes (AUC>0.7) and observed that population  
312 defined by cell surface CD11c<sup>+</sup>CD38<sup>+</sup> is highly associated with the activated monocytes states  
313 (SC-M1 and SC-M4) ( $z$ -score=2.3) (**Fig. 5i, Table 1**). Supporting this finding, indeed using  
314 MASC, we confirmed that synovial CD11c<sup>+</sup>CD38<sup>+</sup> monocytes are significantly expanded in  
315 leukocyte-rich RA (OR = 7.8 (95% CI: 3.6-17.2), one tailed MASC  $p=6.7e-05$ ) (**Table 1**).  
316 Conversely, monocytes from cluster SC-M2 correlate with CD11c<sup>-</sup> by mass cytometry and are  
317 inversely correlated with inflammatory monocyte populations ( $z$ -score=2.7) (**Fig. 5i, Table 1**).

318

### 319 **Heterogeneity in synovial CD4 and CD8 T cells defined by effector functions**

320 Single-cell RNA-seq data defined distinct CD4<sup>+</sup> and CD8<sup>+</sup> T cell populations (**Fig. 6a**).  
321 Among CD4<sup>+</sup> T cells, expression of *CCR7* and *SELL* were notably higher in SC-T1 and the

322 central memory T cells gene set is enriched in SC-T1 expressed genes (**Fig. 6a,b**), supporting  
323 the identification of SC-T1 as central memory T cells. Next, we identified two populations of  
324 CD4<sup>+</sup> T cells marked by high expression of *FOXP3* (SC-T2) and *CXCL13* (SC-T3) (**Fig. 6b**).  
325 Examination of differentially expressed genes between these two T cell subsets suggested that  
326 SC-T2 represents *FOXP3*<sup>+</sup> Tregs<sup>33</sup> while SC-T3 represents *PD-1*<sup>+</sup> Tph cells and Tfh cells<sup>20</sup>  
327 (**Supplemental Fig. 6**).

328 Single-cell RNA-seq analysis of synovial CD8<sup>+</sup> T cells identified three unexpected  
329 populations characterized by distinct expression of effector molecules *GZMK*, *GZMB*, *GZMA*  
330 and *GNLY* (**Fig. 6a**). We defined these populations as *GZMK*<sup>+</sup>*CD8*<sup>+</sup> (SC-T4), *GNLY*<sup>+</sup>*GZMB*<sup>+</sup>  
331 cytotoxic T lymphocytes (CTLs) (SC-T5), and *GZMK*<sup>+</sup>/*GZMB*<sup>+</sup> T cells (SC-T6). *GZMK*<sup>+</sup>/*GZMB*<sup>+</sup> T  
332 cells not only expressed *HLA-DRA* and *HLA-DQA1* at high levels, but also expressed genes  
333 suggestive of an effector phenotype (**Fig. 6a,b**). Application of GSEA to these populations  
334 annotated each of the six T cell clusters (**Fig. 6b**).

335 Many genes specifically expressed by T cell subsets in bulk-sorted T cells were  
336 upregulated in leukocyte-rich RA synovia comparing to OA by bulk-sorted T cells (CD45<sup>+</sup>CD14<sup>-</sup>  
337 CD3<sup>+</sup>), including chemokine *CXCL13* (*t*-test *p*=1.2e-4) and *NFKBID* (*t*-test *p*=1.6e-6), a gene  
338 downstream of TCR activation (**Fig. 6c**). This likely reflected expansion of Tph cells and  
339 activated T cell subsets. Indeed, unbiased interrogation of bulk RNA-seq T cell data using the  
340 top differentially expressed genes (AUC>0.7) among scRNA-seq T cell subsets revealed  
341 significant expansion of Tph/Tfh cells (*t*-test *p*=0.01) (**Fig. 6d**).

342 Using mass cytometry, we identified nine putative T cell clusters among the synovial T  
343 cells (CD45<sup>+</sup>CD14<sup>-</sup>CD3<sup>+</sup>) (**Fig. 6e-g, Supplemental Fig. 4c**). By integrating bulk RNA-seq with  
344 mass cytometry cluster abundances, we found that the gene expression of *CXCL13* and  
345 inhibitory receptors *TIGIT* and *CTLA4* are associated with abundance of the CD4<sup>+</sup>PD-1<sup>+</sup>ICOS<sup>+</sup>  
346 mass cytometry cluster. The abundance of CD8<sup>+</sup>HLA-DR<sup>+</sup> cells was associated with the

347 expression of gene *IFNG* and *HLA-DQA2* (**Fig. 6h**). When aggregating the differentially  
348 expressed marker genes (AUC>0.7) for scRNA-seq clusters, we consistently observed  
349 significant associations between Tph/Tfh cells (SC-T3) and CD4<sup>+</sup>PD-1<sup>+</sup>ICOS<sup>+</sup> T cells (z-score =  
350 3.4); CD8<sup>+</sup> subsets including *GZMK*<sup>+</sup>/*GZMB*<sup>+</sup> (SC-T6), CTLs (SC-T5), and *GZMK*<sup>+</sup> (SC-T4) and  
351 CD8<sup>+</sup>PD-1<sup>+</sup>HLA-DR<sup>+</sup> T cells by mass cytometry (**Fig. 6i, Table 1**), confirming their respective  
352 identities. In addition, CD4<sup>+</sup>PD-1<sup>+</sup>ICOS<sup>+</sup> cells were significantly expanded in leukocyte-rich RA  
353 (MASC OR = 3 (95% CI: 1.7-5.2), one tailed MASC p=2.7e-04) (**Table 1**). Interestingly, Tregs  
354 (SC-T2) exhibited nominal association with CD4<sup>+</sup>PD-1<sup>+</sup>ICOS<sup>+</sup> and CD8<sup>+</sup>PD1<sup>+</sup>HLA-DR<sup>+</sup> T cells  
355 (z-score = 1.5), potentially due to shared gene expression programs between Tregs, Tph/Tfh,  
356 and CD8<sup>+</sup>PD-1<sup>+</sup>HLA-DR<sup>+</sup> T cells.

357

### 358 **Autoimmune-associated B cells expanded in RA synovium by single-cell RNA-seq**

359 We identified synovial B cell 4 clusters with scRNA-seq: naïve B cells (SC-B1), memory B cells  
360 (SC-B2), *CD11c*<sup>+</sup> ABC cells (SC-B3), and plasmablasts (SC-B4) (**Fig. 7a**). Using Gene  
361 Ontology pathway enrichment for these four subsets we observed that MHC Class II protein  
362 complex and interferon-gamma-mediated signaling pathways (**Supplemental Fig. 5b**) were  
363 enriched in all the *HLA*<sup>+</sup> subsets, SC-B1, SC-B2, and SC-B3 (**Fig. 3f**), suggesting B cell  
364 activation. Pathway analysis on curated immunological genes sets demonstrated that SC-B1  
365 expresses naïve B cell genes, while SC-B2 and SC-B3 are more enriched for IgM and IgG  
366 memory B cell genes (**Fig. 7b**). Intriguingly, we observed that SC-B3 cells express high levels of  
367 *CD11c* and *T-bet* (**Fig. 7b**), which are autoimmune-associated B cells (ABC) markers<sup>30,31</sup>, as  
368 well as markers of recently activated B cells including ACTB<sup>34</sup>. High expression of *AICD* is also  
369 in accord with the recently reported transcriptomic analysis of CD11c<sup>+</sup> B cells from SLE  
370 peripheral blood<sup>35</sup>. While ABCs constitute as a relatively small proportion of all B cells, they are  
371 almost exclusively derived from two leukocyte-rich RA patients. Examination of bulk

372 transcriptomic profiles of synovial B cell samples shows that genes *MZB1*, *XBP1* and *CD11c*  
373 genes are upregulated in leukocyte-rich RA (n=16) compared to OA (n=7) (**Fig. 7c**).

374 Mass cytometric data of synovial B cells (CD45<sup>+</sup>CD3<sup>-</sup>CD14<sup>-</sup>CD19<sup>+</sup>) identified ten  
375 putative B cell clusters (**Fig. 7d-f**, **Supplemental Fig. 4d**). Next, we analyzed bulk RNA-seq and  
376 mass cytometry cluster abundances from the shared samples, and found that the gene  
377 expressions of *CD38*, *MZB1*, and plasma cell differentiation factor *XBP1* are associated with  
378 abundance of CD38<sup>++</sup>CD20<sup>-</sup>IgM<sup>-</sup>IgD<sup>-</sup> plasmablasts (**Fig. 7g**). To further validate the distinct  
379 scRNA-seq clusters using mass cytometry, we integrated ten mass cytometry populations with  
380 scRNA-seq clusters and observed significant correlation between plasmablasts (SC-B4) and  
381 CD38<sup>++</sup>CD20<sup>-</sup>IgM<sup>-</sup>IgD<sup>-</sup> B cells (z-score=2.7) (**Fig. 7h**, **Table 1**). Consistent with identification of  
382 ABCs in RA synovia, *CD11c*<sup>+</sup> ABCs (SC-B3) were positively correlated (z-score=1.6) with IgM<sup>-</sup>  
383 IgD<sup>-</sup> HLA-DR<sup>++</sup> CD20<sup>+</sup> CD11c<sup>+</sup>, which is significantly (OR = 5.7 (95% CI: 1.8-22.3), one tailed  
384 MASC p=2.7e-03) expanded in leukocyte-rich RA (**Fig. 7h**, **Table 1**). Mass cytometry analysis  
385 further identified three putative subsets within CD11c<sup>+</sup> cells based on expression of  
386 immunoglobulin profiles: IgM<sup>-</sup> IgD<sup>-</sup> HLA-DR<sup>++</sup> CD20<sup>+</sup> CD11c<sup>+</sup>, CD38<sup>+</sup> HLA-DR<sup>++</sup> CD20<sup>-</sup> CD11c<sup>+</sup>,  
387 and IgM<sup>+</sup> IgD<sup>+</sup> CD11c, suggesting additional heterogeneity within ABCs. Among these, IgM<sup>+</sup> IgD<sup>+</sup>  
388 CD11c B cells express FcRL4, suggesting homology to a population of CD11c<sup>+</sup>FcRL4<sup>+</sup>  
389 memory B cells described in the human tonsil.

390

### 391 **Inflammatory pathways and effector modules revealed by global transcriptomic profiling**

392 We used bulk and single cell transcriptomes of sorted synovial cells to detect pathogenic  
393 molecular signal pathways. First, principal component analysis (PCA) on post-QC OA and  
394 leukocyte-rich RA samples (**Supplemental Fig. 7a,b**) demonstrated that cell type accounted for  
395 most of the variance and each cell type expressed specific marker genes (**Supplemental Fig.**  
396 **7c**). Within each cell-type we observed that leukocyte-rich RA appeared distinct from OA



397 samples, but leukocyte-poor RA grouped together with OA samples (**Supplemental Fig. 7d-g**).  
398 We observed that 173 genes in fibroblasts, 159 genes in monocytes, 10 genes in T cells, and 5  
399 genes in B cells were upregulated in leukocyte-rich RA tissues compared to OA (FC>2 and  
400 FDR<0.01). To define the pathways relevant to leukocyte-rich RA, we applied GSEA weighted  
401 by gene effect sizes and identified TLR signaling (monocytes and B cells), type I interferon  
402 response and inflammatory response (monocytes and fibroblasts) (**Supplemental Fig. 7h-i**), Fc  
403 receptor signaling (monocytes), NF-kappa B signaling (fibroblasts), and interferon gamma (T  
404 cells) pathways (**Fig. 8a**). We observed that in fibroblasts and monocytes that inflammatory  
405 response genes (*PTGS2*, *PTGER3*, and *ICAM1*), interferon response genes (*IFIT2*, *RSAD2*,  
406 *STAT1*, and *XAF1*), and chemokine/cytokine genes (*CCL2* and *CXCL9*) were significantly  
407 upregulated in leukocyte-rich RA (**Fig. 8b**), suggesting a coordinated chemotactic response to  
408 interferon activation. We also observed upregulation of interferon regulatory factors (IRFs),  
409 including *IRF7* and *IRF9* in T cells, and *IRF1*, *IRF7*, *IRF8* and *IRF9* in monocytes. Synovial  
410 monocytes in leukocyte-rich RA exhibit increased expression of *TLR8* and *MYD88*, consistent  
411 with IL-1 or TLR signaling (**Fig. 8a**). Taken together, pathway analysis suggests crosstalk  
412 between immune and stromal cells in leukocyte-rich RA synovia. Inflammatory response genes  
413 upregulated in leukocyte-rich RA, had comparable expression in leukocyte-poor RA and OA  
414 synovial cells (**Fig. 8b**), suggesting leukocyte infiltration is a key driver of molecular  
415 heterogeneity in RA synovia.

416 Next, we asked whether inflammatory cytokines upregulated in leukocyte-rich RA are  
417 driven by global upregulation within a synovial cell type, or specific upregulation within a  
418 discrete cell subset defined by scRNA-seq. Whereas *TNF* was produced at a high level by a  
419 multiple monocyte, B cell and T cell populations; *IL6* expression was restricted to *HLA<sup>high</sup>*  
420 sublining fibroblasts (SC-F2) and naive B cells (SC-B1) (**Fig. 8c**). Similarly, expression of *IL1B*  
421 and *CXCL13* was restricted to *IL1B<sup>+</sup>* pro-inflammatory monocytes (SC-M1) and Tph/Tfh cells

422 (SC-T3), respectively. Surprisingly, we identified CD8 T cells, rather than CD4 T cells, as the  
423 dominant source of *IFN $\gamma$*  in leukocyte-rich synovia.

424 We also observed cell subset-specific responses to inflammatory pathways. Toll-like  
425 receptor signaling pathway was strongly enriched in B cells and monocytes in leukocyte-rich RA  
426 tissues (**Fig. 8a**). At the single cell level, we observed that *TLR10* was only expressed by *HLA*<sup>+</sup>  
427 B cells, indicating that *TLR10* has a functional role within the B cell lineage<sup>36</sup>. In contrast, *TLR8*  
428 was significantly elevated in all RA monocyte subsets. The hematopoietic cell-specific  
429 transcription factor *IRF8* was expressed in a significant fraction of monocytes and *HLA*<sup>+</sup> B cells  
430 that cooperatively regulate differentiation of monocytes and activated B cells in RA synovium.  
431 *SLAMF7*, a potential therapeutic target for Systemic Lupus Erythematosus (SLE)<sup>37</sup>, is highly  
432 expressed by pro-inflammatory monocytes (SC-M1), IFN-activated monocytes (SC-M4),  
433 plasmablasts (SC-B4) and CD8 T cells.

434

## 435 **DISCUSSION**

436 Using multi-model, high-dimensional synovial tissue data we defined stromal and  
437 immune cell populations expanded in RA indicating essential inflammatory pathways.  
438 Recognizing the considerable variation in clinical parameters for disease duration and activity,  
439 treatment types, and joint histology scores<sup>38,39</sup>, we elected to use a molecular parameter, based  
440 on percent lymphocytes, monocytes of the total cellularity, to classify our samples at the local  
441 tissue level. We note that differences in leukocyte enrichment of joint replacement samples and  
442 biopsy samples were best explained by leukocyte infiltration and not by the tissue source  
443 (**Supplemental Fig. 1, Supplemental Fig. 7d-g**).

444 This and previous studies have highlighted stromal fibroblasts as a potential therapeutic  
445 target in RA<sup>40,12</sup>. Consistent with previous reports<sup>12,23,41</sup>, we identified sublining fibroblasts as a  
446 major producer of pro-inflammatory cytokines, notably *IL6*, within the leukocyte-rich synovium

447 **(Fig. 4)**. Furthermore, a single subset of those fibroblasts expressing MHC II (SC-F2,  
448 THY1<sup>+</sup>CD34<sup>-</sup>HLA-DR<sup>high</sup>) was >15 fold expanded in RA tissues, highlighting it as a possible  
449 therapeutic target. In addition, MHC II expression supports a role for stromal cells in T cell  
450 antigen presentation<sup>42</sup>. We also observed that T cells, B cells, and monocyte proportions track  
451 with synovial fibroblasts gene expression, suggesting that synovial fibroblasts respond to  
452 infiltrating lymphocytes in RA synovium (**Supplemental Fig. 8**). Intriguingly, *DNASE1L3*, a gene  
453 whose loss of function is associated with RA<sup>43</sup> and systemic lupus erythematosus<sup>44</sup>  
454 susceptibility in recent genetic studies, was found to be highly expressed in synovial *CD55*<sup>+</sup>  
455 lining fibroblasts (SC-F4), which was relatively depleted in human RA. We identified a novel  
456 fibroblast subset (SC-F3) characterized by high *DKK3* (**Fig. 4**), encoding Dickkopf3, and protein  
457 upregulated in OA that prevents cartilage degradation in vitro<sup>45,46</sup>.

458 Transcriptional heterogeneity in the synovial monocyte compartment indicated that  
459 distinct RA-enriched subsets are driven by inflammatory cytokines (such as IL-1 or TNF) and  
460 interferons (**Fig. 5, Fig. 8**). This suggests monocyte may be sensitive to the local  
461 microenvironment with unique cytokine combinations constituting the inflammatory milieu in the  
462 RA synovium. These inflammatory phenotypes align with effective RA therapeutic targets, for  
463 example TNF and the interferon-activated JAK kinases, respectively<sup>47,48</sup>. The *NUPR1*<sup>+</sup>  
464 monocytes demonstrated lower proportions in RA tissue and had transcriptomes that were anti-  
465 correlated with the inflammatory phenotypes, suggesting either an anti-inflammatory phenotype,  
466 supported by high levels of *MERTK* (**Fig. 5**)<sup>49</sup>, or an unrecognized monocyte phenotype specific  
467 to the normal uninflamed synovium. Alternatively, *NUPR1*<sup>+</sup> markers such as osteoactivin  
468 (*GPNMB*) and cathepsin K (*CTSK*) could indicate a specific subset of osteoclast progenitors  
469 that control bone remodeling (**Fig. 5**)<sup>50,48,51</sup>. Further studies on normal and various disease  
470 control synovial tissues may clarify the functional role of the *NUPR1*<sup>+</sup> (SC-M2) monocyte  
471 phenotype. Furthermore, anatomical and spatial studies of the identified monocyte

472 populations—particularly focused on lining versus sublining, perivascular and lymphocyte  
473 aggregate-associated monocytes—will help to elevate our understanding of the functional roles  
474 for these myeloid cell types.

475         Single cell classification of T cell subsets in RA synovium demonstrated CD4<sup>+</sup> T cell  
476 heterogeneity that is consistent with distinction between the homing capacity and effector  
477 functions of these subsets. Consistent with previous studies, we observed expansion of CD4<sup>+</sup> T  
478 peripheral helper cells<sup>20</sup> (SC-T3, CD4<sup>+</sup>PD-1<sup>+</sup>ICOS<sup>+</sup>) within leukocyte-rich RA synovium. We also  
479 identified distinct CD8 T cell subsets (SC-T4-6) characterized by high expression of *IFNG* and a  
480 distinct granzyme expression pattern (**Fig. 6**). A larger study may be better powered to  
481 differentiate the relative expansion of individual subpopulations. A role of CD8<sup>+</sup> T cells is  
482 consistent with MHC class I genetic associations in rheumatoid arthritis<sup>52</sup>, and may be relevant  
483 to tissue inflammation.

484         To our knowledge, this study is the first to report the presence of autoimmune-  
485 associated B cells (SC-B3, ABCs) by transcriptomic sequencing data in leukocyte-rich synovium  
486 in RA. This B cells population, dependent on *T-bet* for generation and expressing *CD11c*, was  
487 first reported in aging mice; subsequently it was seen to be expanded in autoimmune mice and  
488 enriched for autoreactive specificities<sup>53,54</sup>. We observed heterogeneity in this cell subset, with a  
489 sizable population of *CD11c*<sup>+</sup> B cells detectable in both *IgD*<sup>+</sup> and switched B cell populations by  
490 mass cytometry. The expression of other markers by ABCs in our transcriptome analysis  
491 suggests a balance between germinal center (*IRF8*, *AID*)<sup>55</sup> and plasma cell (*SLAMF7*)  
492 differentiation programs within the RA synovium. We observed that multiple B cell subsets  
493 expressed MHC II, consistent with the potential for B cell antigen presentation in the RA target  
494 tissue. As previously reported, we observed in leukocyte-rich RA synovium an expansion of  
495 plasma cells<sup>56</sup> (SC-B4), which are targeted by rituximab<sup>57</sup>, an effective RA therapy, as  
496 previously demonstrated. We also observe that naive B cells are a dominant *IL6* producer. In

497 contrast to leukocyte-rich RA, OA synovia contain comparatively few B cells (**Fig. 2b**), which  
498 limited our ability to identify RA-associated synovial B cell subsets through case-control  
499 comparisons (**Fig. 7g**).

500 A critical unmet need in RA is identifying therapeutic targets for patients failing to  
501 respond to DMARDs and biologics<sup>38</sup>. We observed upregulation of chemokines (*CXCL8*,  
502 *CXCL9*, and *CXCL13*), cytokines (*IFNG* and *IL15*), and surface receptors (*PDGFRB* and  
503 *SLAMF7*) in distinct immune and stromal cell populations, suggesting potential novel targets.  
504 This study was enabled by important advances in the statistical analysis of single-cell data<sup>21,58-61</sup>  
505 alongside rapid improvements in scaling single cell technologies<sup>17,62</sup> and our recent work  
506 optimizing robust methodologies for disaggregation of synovial tissue<sup>24</sup>.

507 We advance strategies to integrate multiple molecular data sets; these approaches  
508 modulate the effect of technical artifact, frequently confounding single cell technologies<sup>63-65</sup>,  
509 while emphasizing biological signals. Our CCA-based integrative strategy clusters high-  
510 dimensional scRNA-seq data using canonical variates that capture variance that are present in  
511 both the single-cell and bulk RNA-seq data. These shared variances likely represent biological  
512 trends, and not technical factors that would likely be uncorrelated in these two independent data  
513 sets. CCA has been successfully employed effectively in other contexts to integrate high-  
514 dimensional biological data<sup>66,65</sup>. Penalized CCA<sup>67</sup> and deep CCA<sup>68,69</sup> can produce non-linear  
515 variates and may prove to be highly effective as we confront higher throughput platforms with  
516 greater cell-to-cell data.

517 The two single cell modalities used in this study, mass cytometry and scRNA-seq,  
518 complement each other. Single-cell RNA-seq captures expression of thousands of genes<sup>70,71</sup>,  
519 but at the cost of sparse data<sup>63</sup>. A single mass cytometry assay captures hundreds of thousands  
520 of individual cells, but only measures a limited number (~40)<sup>72</sup> of pre-selected markers. But,  
521 since markers are backed with decades of experimental experience they can be effective at

522 defining cellular heterogeneity<sup>73</sup>. Mass cytometry analysis across all cell populations identified  
523 that leukocyte-rich patients show high cell abundances of HLA-DR<sup>+</sup> fibroblast populations, Tph  
524 cells, CD11c<sup>+</sup>CD14<sup>+</sup> monocytes, and CD11c<sup>+</sup> B cell populations (**Supplemental Fig. 4e**).  
525 Combining mass cytometry with the extended dimensionality of scRNA-seq analyses, enables  
526 quantification of well-established cell populations, while also enabling discovery of rare or novel  
527 cell states, such as the CD8 T cell states noted here. We note the recent development of  
528 approaches to capture mRNA and protein expression simultaneously that will further augment  
529 our ability query tissue inflammation<sup>74,75</sup>.

530 Whether cell population expansions and molecular pathways highlighted in this study  
531 represent RA pathogenesis or a downstream effect of inflammation warrants further  
532 investigation. The RA/SLE AMP is now engaged in obtaining a large collection of synovial  
533 biopsy specimens and paired blood samples from 150 RA patients for single cell analyses with  
534 detailed clinical data, disease activity metrics, and ultrasound score evaluation of synovitis. We  
535 anticipate that this ongoing larger study will enable us to not only define additional  
536 subpopulations, but to better define their link to clinical sub-phenotypes.

537 It is essential to interrogate the tissue infiltration of diseases other than RA, including  
538 systemic lupus erythematosus, type I diabetes, psoriasis, multiple sclerosis and other organ  
539 targeting conditions. Application of multiple single cell technologies together can help to define  
540 key novel populations, thereby providing new insights about etiology and potential therapies.

541

## 542 **ACKNOWLEDGMENTS**

543 This work was supported by the Accelerating Medicines Partnership (AMP) in Rheumatoid  
544 Arthritis and Lupus Network. AMP is a public-private partnership (AbbVie Inc., Arthritis  
545 Foundation, Bristol-Myers Squibb Company, Lupus Foundation of America, Lupus Research  
546 Alliance, Merck Sharp & Dohme Corp., National Institute of Allergy and Infectious Diseases,

547 National Institute of Arthritis and Musculoskeletal and Skin Diseases, Pfizer Inc., Rheumatology  
548 Research Foundation, Sanofi and Takeda Pharmaceuticals International, Inc.) created to  
549 develop new ways of identifying and validating promising biological targets for diagnostics and  
550 drug development Funding was provided through grants from the National Institutes of Health  
551 (UH2-AR067676, UH2-AR067677, UH2-AR067679, UH2-AR067681, UH2-AR067685, UH2-  
552 AR067688, UH2-AR067689, UH2-AR067690, UH2-AR067691, UH2-AR067694, and UM2-  
553 AR067678). This work is also supported in part by funding from the Ruth L. Kirschstein National  
554 Research Service Award (F31AR070582) from the National Institute of Arthritis and  
555 Musculoskeletal and Skin Diseases (K.S.). K.W. is supported by a Rheumatology Research  
556 Foundation Scientist Development Award. D.A.R. is supported by NIAMS K08 AR072791-01.  
557 L.T.D. is supported by NIAMS K01 AR066063. J.H.A. is supported by R21 AR071670, and the  
558 Bertha and Louis Weinstein research fund. K.S. is supported by NIAMS F31-AR070582. S.R. is  
559 supported by 1R01AR063759-01A1 and Doris Duke Charitable Foundation Grant #2013097.  
560 A.F., C.D.B. and J.D.T. were supported by the Arthritis Research UK Rheumatoid Arthritis  
561 (#20298), and by the National Institute for Health Research (NIHR)'s Birmingham Biomedical  
562 Research Centre program, supported by the National Institute for Health Research/Wellcome  
563 Trust Clinical Research Facility at University Hospitals Birmingham NHS Foundation Trust.

564

## 565 **AUTHOR CONTRIBUTIONS**

566 S.K., S.G., D.T., L.B.H., K.S.-E., A.M.M., D.L.B., J.H.A., V.P.B., M.H., A.F., C.P., H.P., G.S.F.,  
567 L.M., P.K.G., W.A. and L.T.D. recruited patients and obtained synovial tissues. B.B., E.D. and  
568 E.G. performed histological assessment of tissues. K.W., D.A.R., G.W., and M.B.B. designed  
569 and implemented tissue processing and cell sorting pipeline. J.A.L. obtained mass cytometry  
570 data from samples. N.H. and C.N. obtained single cell RNA-seq data from samples. F.Z., K.S.,  
571 C.Y.F., D.J.L. and S.R. conducted computational and statistical analysis. K.S. implemented the  
572 website. S.R., M.B.B., J.H.A., and L.T.D. supervised the research. F.Z., K.W., and S.R. wrote

573 the initial draft; K.S, C.Y.F. D.A.R, L.T.D., J.H.A, M.B.B. edited it, and all the authors  
574 participated in writing the final manuscript.

575

576 **COMPETING FINANCIAL INTERESTS**

577 The authors declare no competing financial interests.

578

579 **AMP RA Phase 1 consists of all named authors, and also includes the following authors:**

580 Jennifer Albrecht<sup>9</sup>, S. Louis Bridges, Jr.<sup>10</sup>, Christopher D. Buckley<sup>21</sup>, Jane H. Buckner<sup>27</sup>, James  
581 Dolan<sup>19</sup>, Joel M. Guthridge<sup>28</sup>, Maria Gutierrez-Arcelus<sup>1,2,3,4,5</sup>, Lionel B. Ivashkiv<sup>8,29,30</sup>, Eddie A.  
582 James<sup>27</sup>, Judith A. James<sup>28</sup>, Josh Keegan<sup>19</sup>, Yvonne C. Lee<sup>13</sup>, Mandy McGeachy<sup>18</sup>, Michael  
583 McNamara<sup>7,8</sup>, Nida Meednu<sup>9</sup>, Fumitaka Mizoguchi<sup>5,31</sup>, Jennifer Nguyen<sup>19</sup>, Akiko Noma<sup>4</sup>, Dana E.  
584 Orange<sup>7,8,32</sup>, Mina Pichavant<sup>33,34</sup>, Christopher Ritchlin<sup>9</sup>, William H. Robinson<sup>33,34</sup>, Anupamaa  
585 Seshadri<sup>19</sup>, Danielle Sutherby<sup>4</sup>, Jennifer Seifert<sup>23</sup>, Jason D. Turner<sup>21</sup>, Paul J. Utz<sup>33,34</sup>

586

587 <sup>27</sup>Translational Research Program, Benaroya Research Institute at Virginia Mason, Seattle, WA  
588 98101, USA

589 <sup>28</sup>Department of Arthritis & Clinical Immunology, Oklahoma Medical Research Foundation,  
590 Oklahoma City, OK 73104, USA

591 <sup>29</sup>Graduate Program in Immunology and Microbial Pathogenesis, Weill Cornell Graduate School  
592 of Medical Sciences, New York, NY 10065, USA

593 <sup>30</sup>David Z. Rosensweig Genomics Research Center, Hospital for Special Surgery, New York,  
594 NY 10021, USA

595 <sup>31</sup>Department of Rheumatology, Graduate School of Medical and Dental Sciences, Tokyo  
596 Medical and Dental University, Tokyo 113-8519, Japan

597 <sup>32</sup>The Rockefeller University, New York, NY 10065, USA



598 <sup>33</sup>Division of Immunology and Rheumatology, Department of Medicine, Stanford University

599 School of Medicine, Palo Alto, CA 94305, USA

600 <sup>34</sup>The Institute for Immunity, Transplantation, and Infection, Stanford University School of

601 Medicine, CA 94305, USA

## 602 **References**

603 1. Gibofsky, A. Epidemiology, pathophysiology, and diagnosis of rheumatoid arthritis: A

604 Synopsis. *Am. J. Manag. Care* **20**, S128–35 (2014).

605 2. McInnes, I. B. & Schett, G. The pathogenesis of rheumatoid arthritis. *N. Engl. J. Med.* **365**,

606 2205–2219 (2011).

607 3. Orr, C. *et al.* Synovial tissue research: a state-of-the-art review. *Nat. Rev. Rheumatol.* **13**,

608 463–475 (2017).

609 4. Wolfe, F. *et al.* The mortality of rheumatoid arthritis. *Arthritis Rheum.* **37**, 481–494 (1994).

610 5. Namekawa, T., Wagner, U. G., Goronzy, J. J. & Weyand, C. M. Functional subsets of CD4

611 T cells in rheumatoid synovitis. *Arthritis Rheum.* **41**, 2108–2116 (1998).

612 6. Gizinski, A. M. & Fox, D. A. T cell subsets and their role in the pathogenesis of rheumatic

613 disease. *Curr. Opin. Rheumatol.* **26**, 204–210 (2014).

614 7. Reparon-Schuijt, C. C. *et al.* Secretion of anti-citrulline-containing peptide antibody by B

615 lymphocytes in rheumatoid arthritis. *Arthritis Rheum.* **44**, 41–47 (2001).

616 8. Mulherin, D., Fitzgerald, O. & Bresnihan, B. Synovial tissue macrophage populations and

617 articular damage in rheumatoid arthritis. *Arthritis Rheum.* **39**, 115–124 (1996).

618 9. Kinne, R. W., Bräuer, R., Stuhlmüller, B., Palombo-Kinne, E. & Burmester, G. R.

619 Macrophages in rheumatoid arthritis. *Arthritis Res.* **2**, 189–202 (2000).

620 10. Müller-Ladner, U. *et al.* Synovial fibroblasts of patients with rheumatoid arthritis attach to

621 and invade normal human cartilage when engrafted into SCID mice. *Am. J. Pathol.* **149**,

622 1607–1615 (1996).

- 623 11. Pap, T., Müller-Ladner, U., Gay, R. E. & Gay, S. Fibroblast biology. Role of synovial  
624 fibroblasts in the pathogenesis of rheumatoid arthritis. *Arthritis Res.* **2**, 361–367 (2000).
- 625 12. Noss, E. H. & Brenner, M. B. The role and therapeutic implications of fibroblast-like  
626 synoviocytes in inflammation and cartilage erosion in rheumatoid arthritis. *Immunol. Rev.*  
627 **223**, 252–270 (2008).
- 628 13. Dennis, G., Jr *et al.* Synovial phenotypes in rheumatoid arthritis correlate with response to  
629 biologic therapeutics. *Arthritis Res. Ther.* **16**, R90 (2014).
- 630 14. Orange, D. E. *et al.* Machine learning integration of rheumatoid arthritis synovial histology  
631 and RNAseq data identifies three disease subtypes. *Arthritis Rheumatol* (2018).  
632 doi:10.1002/art.40428
- 633 15. Lindberg, J. *et al.* Variability in synovial inflammation in rheumatoid arthritis investigated by  
634 microarray technology. *Arthritis Res. Ther.* **8**, R47 (2006).
- 635 16. Stephenson, W. *et al.* Single-cell RNA-seq of rheumatoid arthritis synovial tissue using low-  
636 cost microfluidic instrumentation. *Nat. Commun.* **9**, 791 (2018).
- 637 17. Papalexi, E. & Satija, R. Single-cell RNA sequencing to explore immune cell heterogeneity.  
638 *Nat. Rev. Immunol.* **18**, 35–45 (2018).
- 639 18. Schelker, M. *et al.* Estimation of immune cell content in tumour tissue using single-cell  
640 RNA-seq data. *Nat. Commun.* **8**, 2032 (2017).
- 641 19. Wong, M. T. *et al.* A High-Dimensional Atlas of Human T Cell Diversity Reveals Tissue-  
642 Specific Trafficking and Cytokine Signatures. *Immunity* **45**, 442–456 (2016).
- 643 20. Rao, D. A. *et al.* Pathologically expanded peripheral T helper cell subset drives B cells in  
644 rheumatoid arthritis. *Nature* **542**, 110–114 (2017).
- 645 21. Fonseka, C. Y. *et al.* Reverse Association Of Single Cells To Rheumatoid Arthritis  
646 Accounting For Mixed Effects Identifies An Expanded CD27- HLA-DR+ Effector Memory  
647 CD4+ T Cell Population. *bioRxiv* 172403 (2017). doi:10.1101/172403
- 648 22. Villani, A.-C. *et al.* Single-cell RNA-seq reveals new types of human blood dendritic cells,

- 649 monocytes, and progenitors. *Science* **356**, (2017).
- 650 23. Mizoguchi, F. *et al.* Functionally distinct disease-associated fibroblast subsets in  
651 rheumatoid arthritis. *Nat. Commun.* **9**, 789 (2018).
- 652 24. Donlin, L. T. *et al.* High dimensional analyses of cells dissociated from cryopreserved  
653 synovial tissue. *bioRxiv* 284844 (2018). doi:10.1101/284844
- 654 25. Becher, B. *et al.* High-dimensional analysis of the murine myeloid cell system. *Nat.*  
655 *Immunol.* **15**, 1181–1189 (2014).
- 656 26. van Baarsen, L. G. M. *et al.* Synovial tissue heterogeneity in rheumatoid arthritis in relation  
657 to disease activity and biomarkers in peripheral blood. *Arthritis Rheum.* **62**, 1602–1607  
658 (2010).
- 659 27. De Maesschalck, R., Jouan-Rimbaud, D. & Massart, D. L. The Mahalanobis distance.  
660 *Chemometrics Intellig. Lab. Syst.* **50**, 1–18 (2000).
- 661 28. Krenn, V. *et al.* Grading of Chronic Synovitis — A Histopathological Grading System for  
662 Molecular and Diagnostic Pathology. *Pathology - Research and Practice* **198**, 317–325  
663 (2002).
- 664 29. Maaten, L. van der & Hinton, G. Visualizing Data using t-SNE. *J. Mach. Learn. Res.* **9**,  
665 2579–2605 (2008).
- 666 30. Rubtsov, A. V. *et al.* CD11c-Expressing B Cells Are Located at the T Cell/B Cell Border in  
667 Spleen and Are Potent APCs. *J. Immunol.* **195**, 71–79 (2015).
- 668 31. Pillai, S. Now you know your ABCs. *Blood* **118**, 1187–1188 (2011).
- 669 32. Todd, D. J. *et al.* XBP1 governs late events in plasma cell differentiation and is not required  
670 for antigen-specific memory B cell development. *J. Exp. Med.* **206**, 2151–2159 (2009).
- 671 33. Josefowicz, S. Z., Lu, L.-F. & Rudensky, A. Y. Regulatory T cells: mechanisms of  
672 differentiation and function. *Annu. Rev. Immunol.* **30**, 531–564 (2012).
- 673 34. Ellebedy, A. H. *et al.* Defining antigen-specific plasmablast and memory B cell subsets in  
674 human blood after viral infection or vaccination. *Nat. Immunol.* **17**, 1226–1234 (2016).

- 675 35. Wang, S. *et al.* IL-21 drives expansion and plasma cell differentiation of autoreactive  
676 CD11c<sup>hi</sup> T-bet<sup>+</sup> B cells in SLE. *Nat. Commun.* **9**, 1758 (2018).
- 677 36. Hess, N. J., Jiang, S., Li, X., Guan, Y. & Tapping, R. I. TLR10 Is a B Cell Intrinsic  
678 Suppressor of Adaptive Immune Responses. *J. Immunol.* **198**, 699–707 (2017).
- 679 37. Comte, D. *et al.* Signaling Lymphocytic Activation Molecule Family Member 7 Engagement  
680 Restores Defective Effector CD8<sup>+</sup> T Cell Function in Systemic Lupus Erythematosus.  
681 *Arthritis Rheumatol* **69**, 1035–1044 (2017).
- 682 38. Smolen, J. S. How well can we compare different biologic agents for RA? *Nat. Rev.*  
683 *Rheumatol.* **6**, 247–248 (2010).
- 684 39. Pitzalis, C., Kelly, S. & Humby, F. New learnings on the pathophysiology of RA from  
685 synovial biopsies. *Curr. Opin. Rheumatol.* **25**, 334–344 (2013).
- 686 40. Filer, A. The fibroblast as a therapeutic target in rheumatoid arthritis. *Curr. Opin.*  
687 *Pharmacol.* **13**, 413–419 (2013).
- 688 41. Nguyen, H. N. *et al.* Autocrine Loop Involving IL-6 Family Member LIF, LIF Receptor, and  
689 STAT4 Drives Sustained Fibroblast Production of Inflammatory Mediators. *Immunity* **46**,  
690 220–232 (2017).
- 691 42. Tran, C. N. *et al.* Presentation of arthritogenic peptide to antigen-specific T cells by  
692 fibroblast-like synoviocytes. *Arthritis Rheum.* **56**, 1497–1506 (2007).
- 693 43. Westra, H.-J. *et al.* Fine-mapping identifies causal variants for RA and T1D in DNASE1L3,  
694 SIRPG, MEG3, TNFAIP3 and CD28/CTLA4 loci. *bioRxiv* 151423 (2017).  
695 doi:10.1101/151423
- 696 44. Al-Mayouf, S. M. *et al.* Loss-of-function variant in DNASE1L3 causes a familial form of  
697 systemic lupus erythematosus. *Nat. Genet.* **43**, 1186–1188 (2011).
- 698 45. Snelling, S. J. B. *et al.* Dickkopf-3 is upregulated in osteoarthritis and has a  
699 chondroprotective role. *Osteoarthritis Cartilage* **24**, 883–891 (2016).
- 700 46. Snelling, S., Davidson, R., Swingler, T., Price, A. & Clark, I. Dkk3 Can prevent cartilage

- 701 degradation and modulate TGFbeta and Wnt signalling. *Osteoarthritis Cartilage* **20**, S10  
702 (2012).
- 703 47. Weinblatt, M. E. *et al.* A trial of etanercept, a recombinant tumor necrosis factor receptor:Fc  
704 fusion protein, in patients with rheumatoid arthritis receiving methotrexate. *N. Engl. J. Med.*  
705 **340**, 253–259 (1999).
- 706 48. Lee, E. B. *et al.* Tofacitinib versus methotrexate in rheumatoid arthritis. *N. Engl. J. Med.*  
707 **370**, 2377–2386 (2014).
- 708 49. Zizzo, G., Hilliard, B. A., Monestier, M. & Cohen, P. L. Efficient clearance of early apoptotic  
709 cells by human macrophages requires M2c polarization and MerTK induction. *J. Immunol.*  
710 **189**, 3508–3520 (2012).
- 711 50. Skoumal, M. *et al.* Serum cathepsin K levels of patients with longstanding rheumatoid  
712 arthritis: correlation with radiological destruction. *Arthritis Res. Ther.* **7**, R65–70 (2005).
- 713 51. Frara, N. *et al.* Transgenic Expression of Osteoactivin/gpnb Enhances Bone Formation In  
714 Vivo and Osteoprogenitor Differentiation Ex Vivo. *J. Cell. Physiol.* **231**, 72–83 (2016).
- 715 52. Raychaudhuri, S. *et al.* Five amino acids in three HLA proteins explain most of the  
716 association between MHC and seropositive rheumatoid arthritis. *Nat. Genet.* **44**, 291  
717 (2012).
- 718 53. Rubtsov, A. V. *et al.* Toll-like receptor 7 (TLR7)-driven accumulation of a novel CD11c<sup>+</sup> B-  
719 cell population is important for the development of autoimmunity. *Blood* **118**, 1305–1315  
720 (2011).
- 721 54. Manni, M. *et al.* Regulation of age-associated B cells by IRF5 in systemic autoimmunity.  
722 *Nat. Immunol.* **19**, 407–419 (2018).
- 723 55. Cattoretti, G. *et al.* Stages of germinal center transit are defined by B cell transcription  
724 factor coexpression and relative abundance. *J. Immunol.* **177**, 6930–6939 (2006).
- 725 56. Humby, F. *et al.* Ectopic Lymphoid Structures Support Ongoing Production of Class-  
726 Switched Autoantibodies in Rheumatoid Synovium. *PLoS Med.* **6**, e1 (2009).

- 727 57. Marston, B., Palanichamy, A. & Anolik, J. H. B cells in the pathogenesis and treatment of  
728 rheumatoid arthritis. *Curr. Opin. Rheumatol.* **22**, 307–315 (2010).
- 729 58. Dey, K. K., Hsiao, C. J. & Stephens, M. Visualizing the structure of RNA-seq expression  
730 data using grade of membership models. *PLoS Genet.* **13**, e1006599 (2017).
- 731 59. Kiselev, V. Y. *et al.* SC3: consensus clustering of single-cell RNA-seq data. *Nat. Methods*  
732 (2017). doi:10.1038/nmeth.4236
- 733 60. Satija, R., Farrell, J. A., Gennert, D., Schier, A. F. & Regev, A. Spatial reconstruction of  
734 single-cell gene expression data. *Nat. Biotechnol.* **33**, 495–502 (2015).
- 735 61. Wang, B., Zhu, J., Pierson, E., Ramazzotti, D. & Batzoglou, S. Visualization and analysis of  
736 single-cell RNA-seq data by kernel-based similarity learning. *Nat. Methods* (2017).  
737 doi:10.1038/nmeth.4207
- 738 62. Svensson, V., Vento-Tormo, R. & Teichmann, S. A. Exponential scaling of single-cell RNA-  
739 seq in the last decade. *arXiv [q-bio.GN]* (2017).
- 740 63. Hicks, S. C., Townes, F. W., Teng, M. & Irizarry, R. A. Missing data and technical variability  
741 in single-cell RNA-sequencing experiments. *Biostatistics* (2017).  
742 doi:10.1093/biostatistics/kxx053
- 743 64. Tung, P.-Y. *et al.* Batch effects and the effective design of single-cell gene expression  
744 studies. *Sci. Rep.* **7**, 39921 (2017).
- 745 65. Butler, A., Hoffman, P., Smibert, P., Papalexi, E. & Satija, R. Integrating single-cell  
746 transcriptomic data across different conditions, technologies, and species. *Nat. Biotechnol.*  
747 (2018). doi:10.1038/nbt.4096
- 748 66. Parkhomenko, E., Tritchler, D. & Beyene, J. Sparse canonical correlation analysis with  
749 application to genomic data integration. *Stat. Appl. Genet. Mol. Biol.* **8**, Article 1 (2009).
- 750 67. Witten, D. M., Tibshirani, R. & Hastie, T. A penalized matrix decomposition, with  
751 applications to sparse principal components and canonical correlation analysis. *Biostatistics*  
752 **10**, 515–534 (2009).

- 753 68. Andrew, G., Arora, R., Bilmes, J. & Livescu, K. Deep Canonical Correlation Analysis. in  
754 *International Conference on Machine Learning* 1247–1255 (2013).
- 755 69. Benton, A. *et al.* Deep Generalized Canonical Correlation Analysis. *arXiv [cs.LG]* (2017).
- 756 70. Hashimshony, T. *et al.* CEL-Seq2: sensitive highly-multiplexed single-cell RNA-Seq.  
757 *Genome Biol.* **17**, 77 (2016).
- 758 71. Zheng, G. X. Y. *et al.* Massively parallel digital transcriptional profiling of single cells. *Nat.*  
759 *Commun.* **8**, 14049 (2017).
- 760 72. Bendall, S. C. *et al.* Single-cell mass cytometry of differential immune and drug responses  
761 across a human hematopoietic continuum. *Science* **332**, 687–696 (2011).
- 762 73. Bjornson, Z. B., Nolan, G. P. & Fantl, W. J. Single-cell mass cytometry for analysis of  
763 immune system functional states. *Curr. Opin. Immunol.* **25**, 484–494 (2013).
- 764 74. Peterson, V. M. *et al.* Multiplexed quantification of proteins and transcripts in single cells.  
765 *Nat. Biotechnol.* **35**, 936–939 (2017).
- 766 75. Stoeckius, M. *et al.* Simultaneous epitope and transcriptome measurement in single cells.  
767 *Nat. Methods* **14**, 865–868 (2017).
- 768 76. Finck, R. *et al.* Normalization of mass cytometry data with bead standards. *Cytometry A* **83**,  
769 483–494 (2013).
- 770 77. González, I., Déjean, S., Martin, P. & Baccini, A. CCA: An R Package to Extend Canonical  
771 Correlation Analysis. *Journal of Statistical Software, Articles* **23**, 1–14 (2008).
- 772 78. Sing, T., Sander, O., Beerenwinkel, N. & Lengauer, T. ROCR: visualizing classifier  
773 performance in R. *Bioinformatics* **21**, 3940–3941 (2005).
- 774 79. Subramanian, A. *et al.* Gene set enrichment analysis: A knowledge-based approach for  
775 interpreting genome-wide expression profiles. *Proceedings of the National Academy of*  
776 *Sciences* **102**, 15545–15550 (2005).
- 777 80. Ashburner, M. *et al.* Gene ontology: tool for the unification of biology. The Gene Ontology  
778 Consortium. *Nat. Genet.* **25**, 25–29 (2000).

- 779 81. Liberzon, A. *et al.* The Molecular Signatures Database (MSigDB) hallmark gene set  
780 collection. *Cell Syst* **1**, 417–425 (2015).
- 781 82. Reynolds, A. P., Richards, G., de la Iglesia, B. & Rayward-Smith, V. J. Clustering Rules: A  
782 Comparison of Partitioning and Hierarchical Clustering Algorithms. *J. Math. Model.*  
783 *Algorithms* **5**, 475–504 (2006).
- 784 83. Rousseeuw, P. J. Silhouettes: A graphical aid to the interpretation and validation of cluster  
785 analysis. *J. Comput. Appl. Math.* **20**, 53–65 (1987).



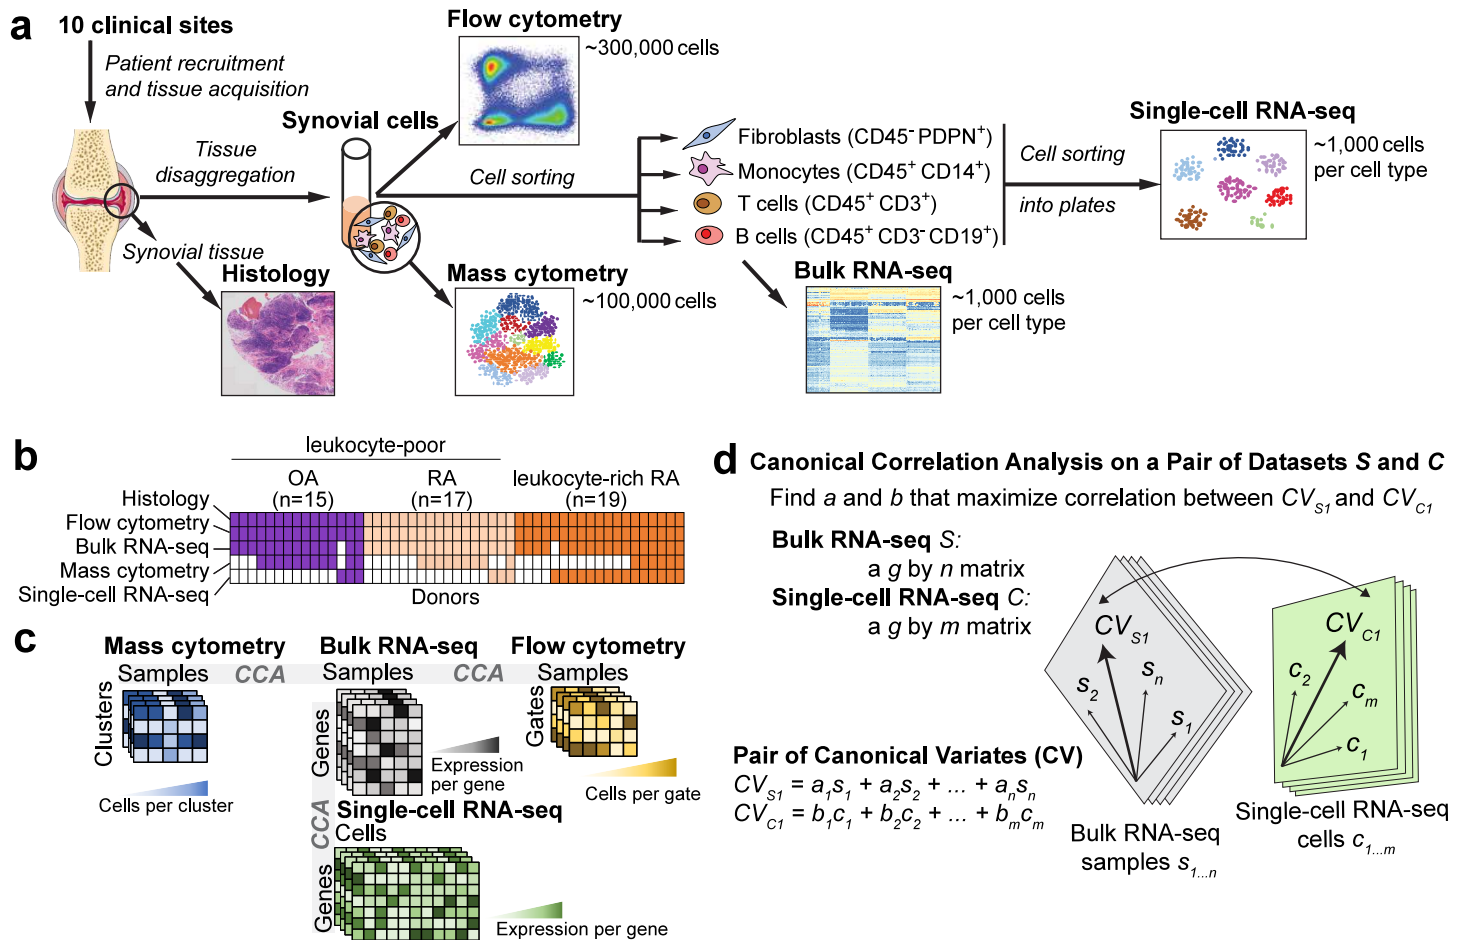

**Fig. 1.** Overview of synovial tissue workflow and pairwise analysis of high-dimensional data. **a.** We acquired synovial tissue, disaggregated the cells, sorted them into four gates representing fibroblasts (CD45<sup>-</sup>PDPN<sup>+</sup>), monocytes (CD45<sup>+</sup>CD14<sup>+</sup>), T cells (CD45<sup>+</sup>CD3<sup>+</sup>), and B cells (CD45<sup>+</sup>CD3<sup>-</sup>CD19<sup>+</sup>). We profiled these cells with mass cytometry, flow cytometry, sorted low-input bulk RNA-seq, and single-cell RNA-seq. **b.** Presence and absence of five different data types for each tissue sample. **c.** Schematic of each dataset and the shared dimensions used to analyze each of the 3 pairs of datasets with canonical correlation analysis (CCA). **d.** CCA finds a common mapping for two datasets. For bulk and single-cell RNA-seq, we first find a common set of  $g$  genes present in both datasets. Each bulk sample  $s_i$  gets a coefficient  $a_i$  and each cell  $c_j$  gets a coefficient  $b_j$ . The linear combination of all samples  $s_{1..n}$  arranges bulk genes along the canonical variate  $CV_{S_1}$  and the linear combination of all cells  $c_{1..m}$  arranges single-cell genes along  $CV_{C_1}$ . CCA finds the coefficients  $a_{1..n}$  and  $b_{1..m}$  that arrange the genes from the two datasets in such a way that the correlation between the genes is maximized. After CCA finds the first pair of canonical variates, the next pair is computed on the residuals, and so on.

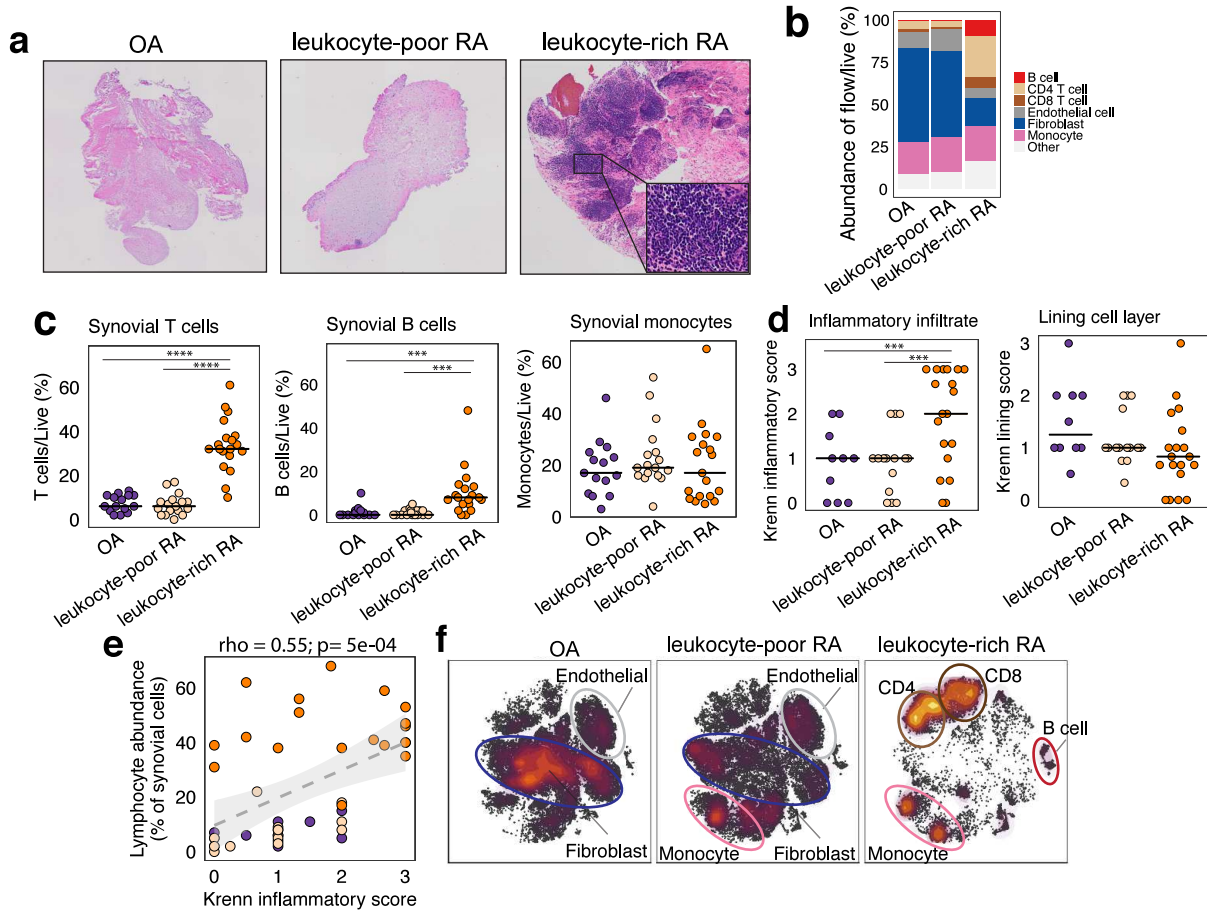

**Fig. 2.** Distinct cellular composition in synovial tissue from OA, leukocyte-poor RA, and leukocyte-rich RA patients. **a.** Histological assessment of synovial tissue derived from OA, leukocyte-poor RA, and leukocyte-rich RA. **b.** Cellular composition of major synovial cell types by flow cytometry. **c.** Synovial T cells, B cells, and monocytes by flow cytometry in samples from OA (n=15), leukocyte-poor RA (n=17), and leukocyte-rich RA (n=19). Leukocyte-rich RA tissues were significantly higher infiltrated in synovial T cells (Student's t-test  $p=4e-9$ ,  $t\text{-value}=8.92$ ,  $df=22.27$ ) and B cells (Student's t-test  $p=1e-3$ ,  $t\text{-value}=3.50$ ,  $df=20.56$ ) compared to OA. Statistical significance levels: \*\*\*\* $p \leq 1e-4$ , \*\*\* $p \leq 1e-3$ . **d.** Quantitative histologic inflammatory scoring of both sublining cell layer and lining layer. Leukocyte-rich RA samples (n=19) exhibited higher (Student's t-test  $p=1e-3$ ,  $t\text{-value}=3.21$ ,  $df=30.66$ ) Krenn inflammation scores than leukocyte-poor RA (n=15) and OA tissues (n=10) samples. **e.** Spearman correlation ( $\rho = 0.55$ ,  $p=5e-04$ ) between lymphocytic infiltration assessed by cytometry with histologic inflammation score (n=44). **f.** tSNE visualization of synovial cell types in OA, leukocyte-poor RA, and leukocyte-rich RA by mass cytometry density plot.

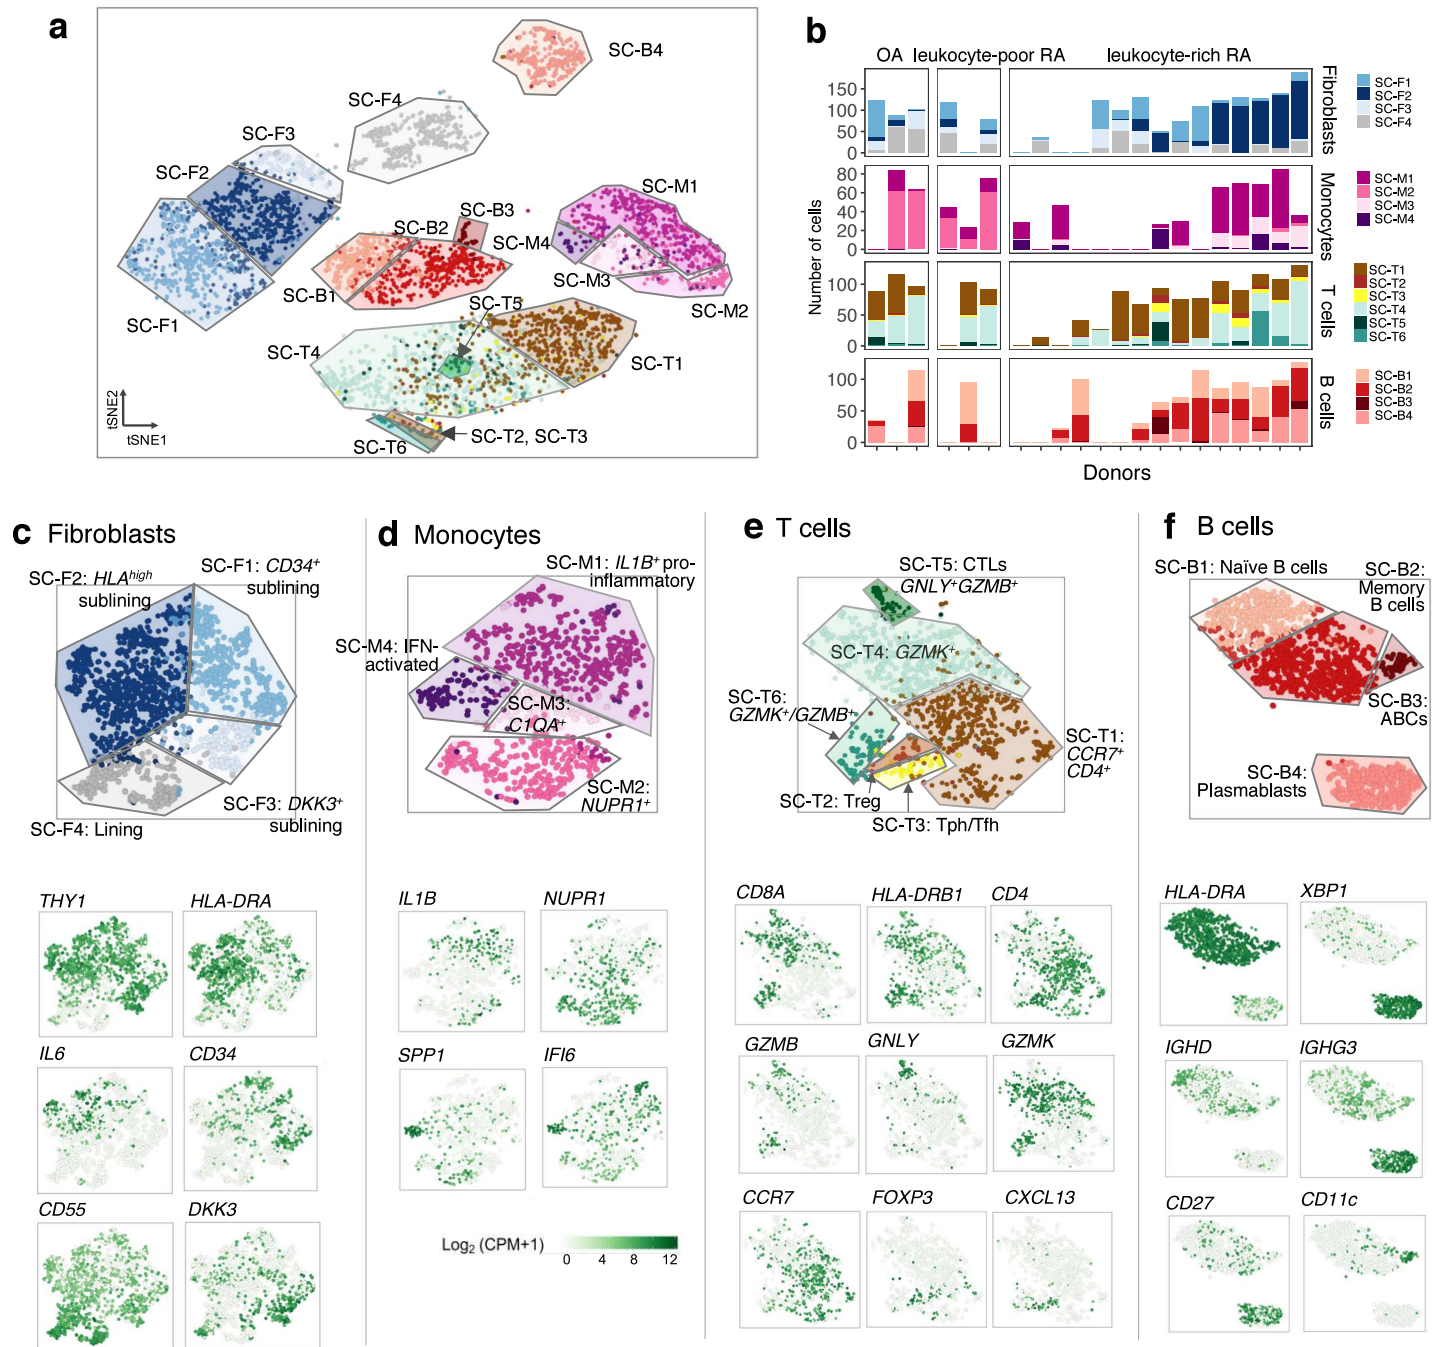

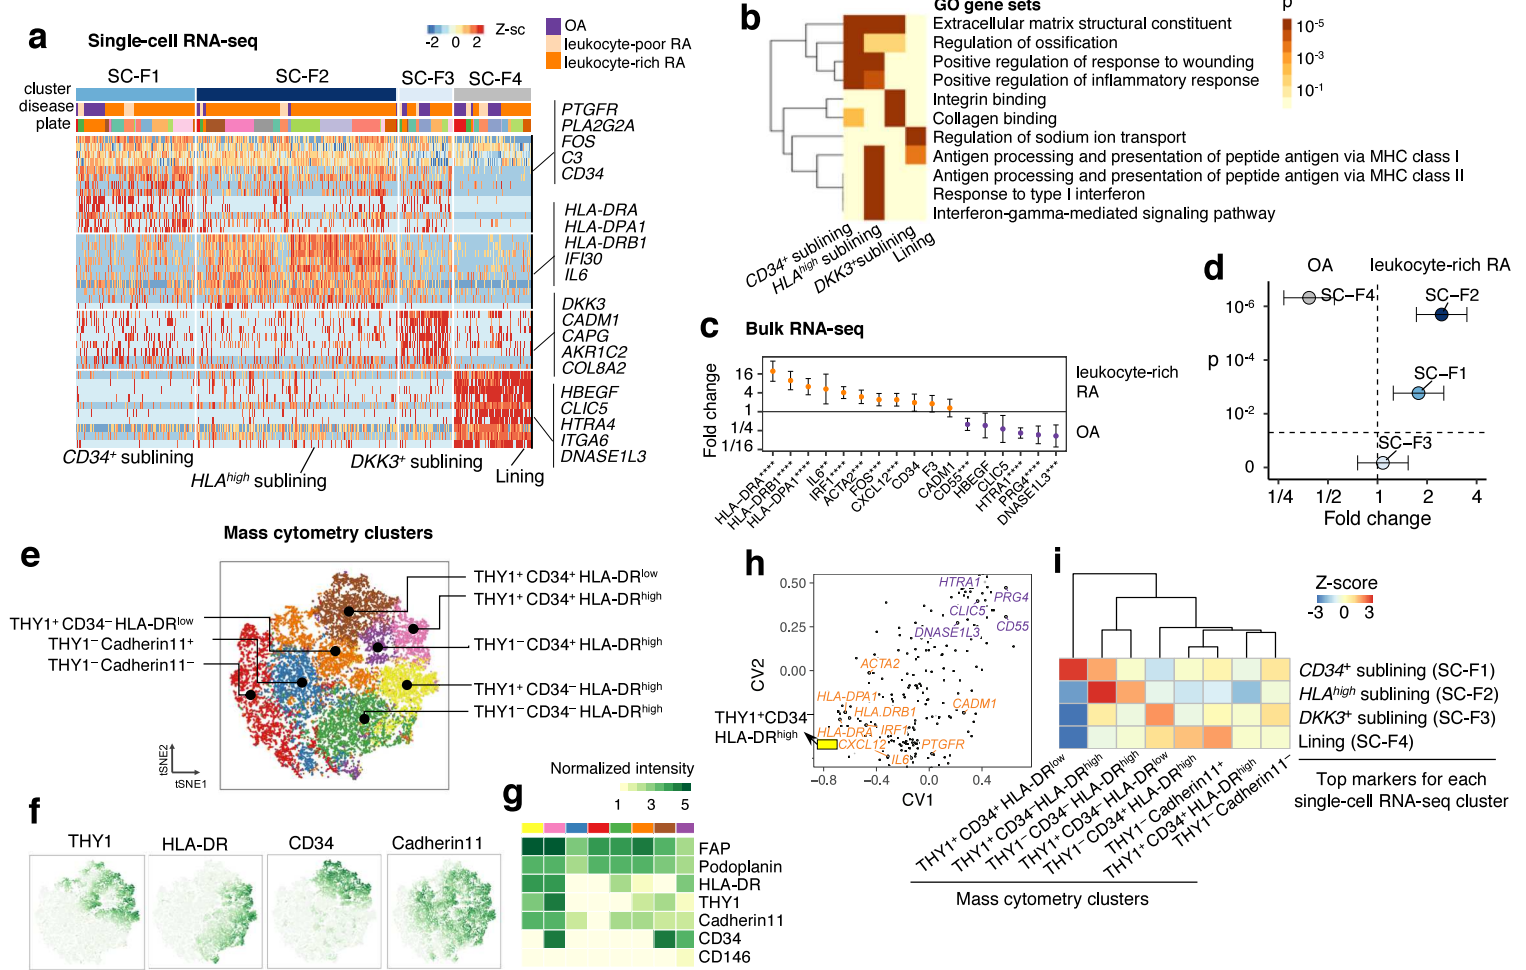

**Fig. 4.** Distinct synovial fibroblasts defined by cytokine activation and MHC II expression. **a.** Single-cell RNA-seq analysis identified three sublining fibroblasts, *CD34*<sup>+</sup> (SC-F1), *HLA*<sup>high</sup> (SC-F2), and *DKK3*<sup>+</sup> (SC-F3) and one lining subset (SC-F4). **b.** Pathway enrichment analysis indicates the potential pathways for each cluster. **c.** Differential analysis on leukocyte-rich RA (n=16) with OA (n=12) by bulk RNA-seq fibroblast samples revealed genes that upregulated and downregulated in leukocyte-rich RA. Effect size with 95% confidence intervals are given. Significantly differentially expressed (\*\*\*\*p ≤ 1e-4, \*\*\*p ≤ 1e-3, \*\*p ≤ 1e-2) genes are highlighted. **d.** By querying the leukocyte-rich RA (n=16) and OA (n=12) fibroblast bulk RNA-seq samples, single-cell RNA-seq cluster *HLA*<sup>+</sup> (SC-F2) and *CD34*<sup>+</sup> (SC-F1) fibroblasts are significantly upregulated (two-tailed Student's *t*-test p=2e-6, t-value=6.2, df = 23.91 and p=2e-3, t-value = 3.20, df = 25.41, respectively) in leukocyte-rich RA, while lining cells (SC-F4) are enriched (two-tailed Student's *t*-test p=5e-7, t-value=-5.31, df = 21.97) in OA samples. **e.** Mass cytometry analysis revealed eight distinct populations. **f-g.** Normalized intensity of distinct protein markers are shown in tSNE visualization and heatmap. **h.** Integration of identified mass cytometry clusters with bulk RNA-seq using CCA. First two canonical variates (CV) separated genes that upregulated in leukocyte-rich RA from genes that depleted in leukocyte-rich RA. *HLA*<sup>high</sup> genes are highly associated with THY1<sup>+</sup>CD34<sup>+</sup>HLA-DR<sup>high</sup> fibroblasts by mass cytometry. **i.** Integration of mass cytometry clusters with single-cell RNA-seq clusters using the top markers (AUC > 0.7) for each single-cell RNA-seq cluster based on the top 10 canonical variates in the CCA space. We computed the spearman correlation between each pair of single-cell RNA-seq cluster and mass cytometry cluster in the CCA space and performed permutation test 10<sup>4</sup> times. Z-score is calculated based on permutation p-value. We observed *HLA*<sup>high</sup> sublining fibroblasts are strongly correlated with THY1<sup>+</sup>CD34<sup>+</sup>HLA-DR<sup>high</sup> fibroblasts by mass cytometry.

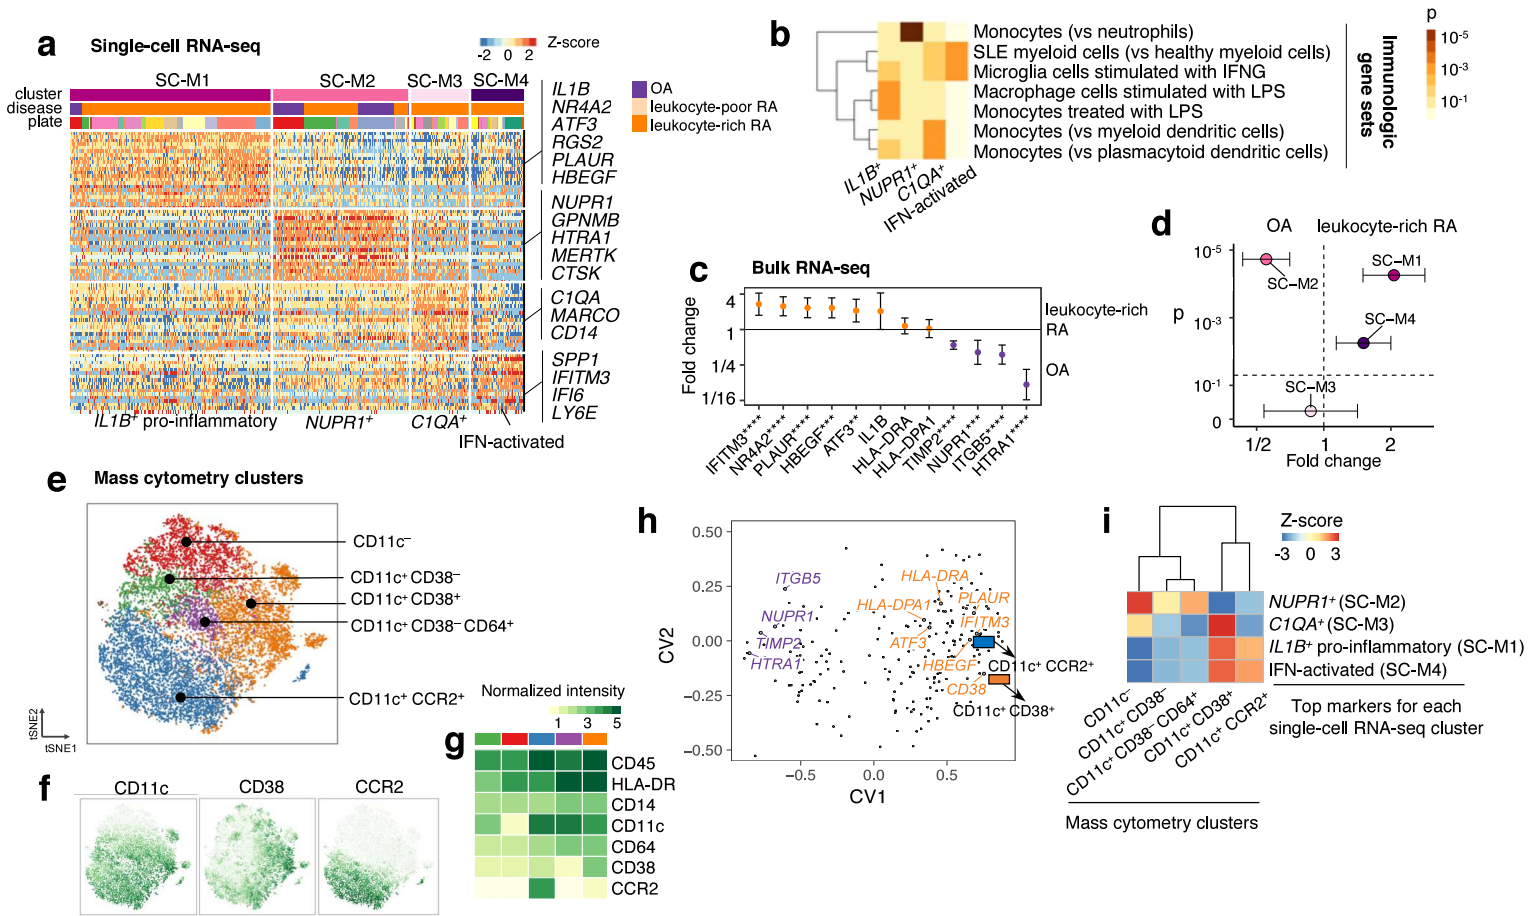

**Fig. 5.** Unique activation states define synovial monocytes heterogeneity. **a.** Single-cell RNA-seq analysis identified four subsets: *IL1B*<sup>+</sup> pro-inflammatory monocytes (SC-M1), *NUPR1*<sup>+</sup> monocytes (SC-M2) with a mixture of RA and OA cells, *C1QA*<sup>+</sup> (SC-M3), and IFN-activated monocytes (SC-M4). **b.** Pathway enrichment analysis indicates the potential pathways for each cluster. The standard names for the immunological gene sets from up to bottom are: Genes down-regulated in neutrophils versus monocytes (GSE22886); Genes down-regulated in healthy myeloid cells versus SLE myeloid cells (GSE10325); Genes down-regulated in control microglia cells versus those 24 h after stimulation with IFNG (GSE1432); Genes down-regulated in unstimulated macrophage cells versus macrophage cells stimulated with LPS (GSE14769); Genes up-regulated monocytes treated with LPS versus monocytes treated with control IgG (GSE9988); Genes up-regulated in monocytes versus myeloid dendritic cells (mDC) (GSE29618); Genes up-regulated in monocytes versus plasmacytoid dendritic cells (pDC) (GSE29618). **c.** Differentially expressed genes (\*\*\*\**p* ≤ 1e-4, \*\*\**p* ≤ 1e-3, \*\**p* ≤ 1e-2) by bulk RNA-seq on leukocyte-rich RA samples (n=17) and OA samples (n=13). Effect size with 95% confidence intervals are given. **d.** By querying the bulk RNA-seq, we found single-cell RNA-seq cluster *IL1B*<sup>+</sup> pro-inflammatory monocytes (two-tailed Student's *t*-test *p*=6e-5, *t*-value=4.56, *df* =26.33) and IFN-activated monocytes (two-tailed Student's *t*-test *p*=6e-3, *t*-value=3.28, *df* =23.68) are upregulated in leukocyte-rich RA, while SC-M2 is depleted (two-tailed Student's *t*-test *p*=2e-5, *t*-value=-5.62, *df*=26.81) in leukocyte-rich RA samples. **e.** Mass cytometry analysis revealed five distinct populations. **f-g.** Normalized intensity of distinct protein markers are shown in tSNE visualization and heatmap. **h.** Integration of identified mass cytometry clusters with bulk RNA-seq reveals genes that are associated with CD11c<sup>+</sup>CD38<sup>+</sup> and CD11c<sup>+</sup>CCR2<sup>+</sup>, like *IFITM3*, *CD38*, *HBEGF*, *ATF3*, and *HLA*<sup>+</sup> genes. **i.** Integration of mass cytometry clusters and single-cell RNA-seq clusters revealed that CD11c<sup>+</sup>CD38<sup>+</sup> and CD11c<sup>+</sup>CCR2<sup>+</sup> by mass cytometry are significantly associated with *IL1B*<sup>+</sup> pro-inflammatory (SC-M1) and IFN-activated (SC-M4) monocytes.

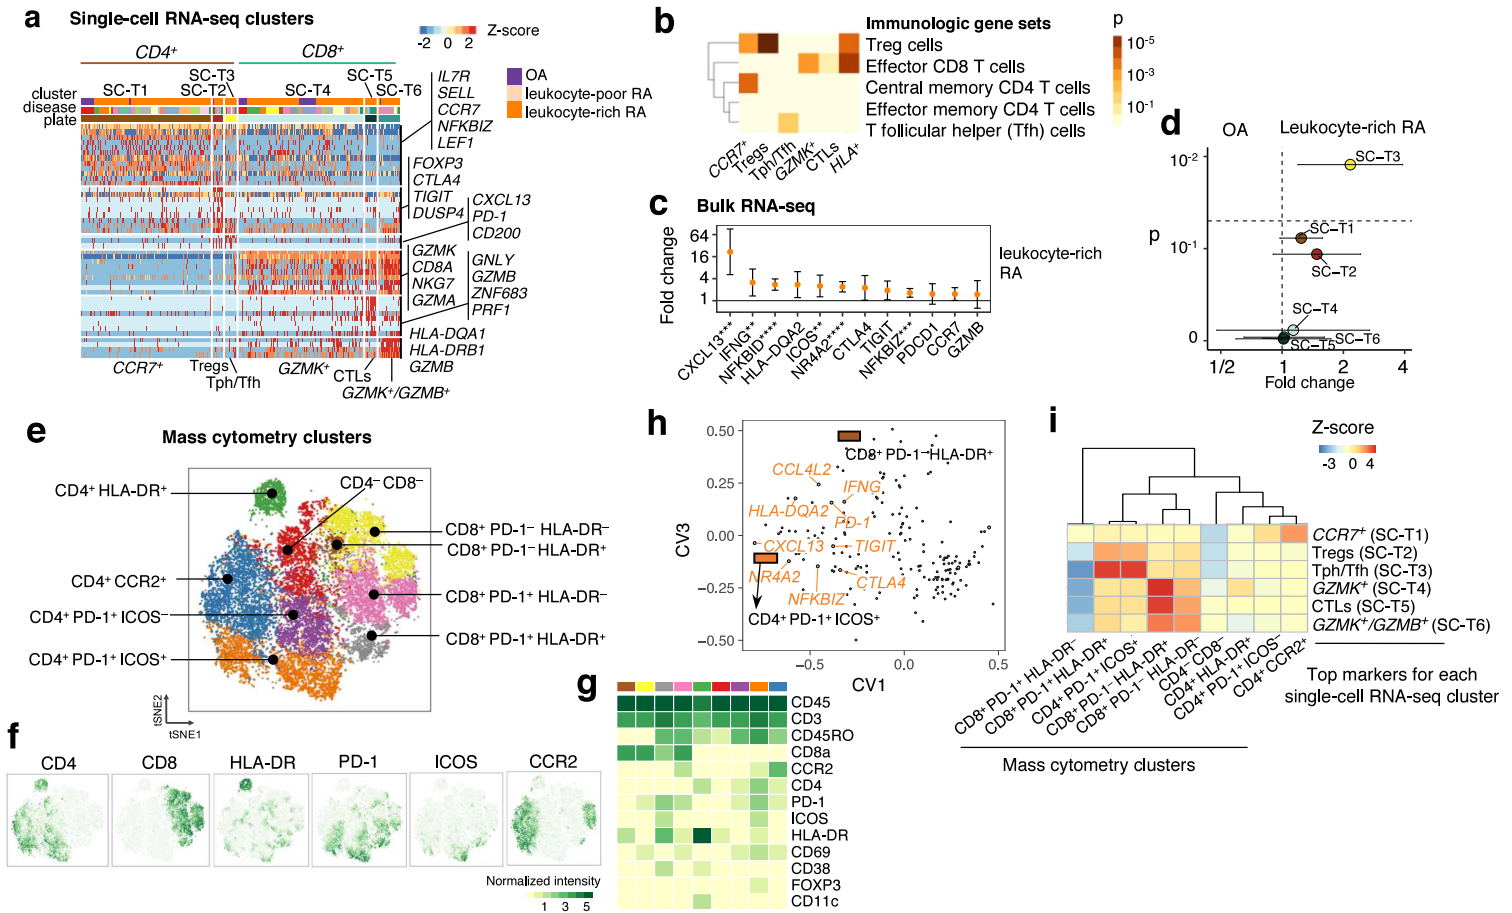

**Fig. 6.** Synovial T cells display heterogeneous subpopulations in RA synovium. **a.** Single-cell RNA-seq analysis identified three  $CD4^+$  subsets:  $CCR7^+$  (SC-T1), Treg (SC-T2), and Tph/Tfh (SC-T3); and three  $CD8^+$  subsets:  $GZMK^+$  (SC-T4), CTLs (SC-T5), and  $GZMK^+/GZMB^+$  (SC-T6). **b.** Pathway analysis based on immunologic gene set enrichment indicates the potential enriched T cell states pathways. The brief description of the standard names from up to bottom are: Genes up-regulated in  $CD4$  high cells from thymus: Treg versus T conv (GSE42021); Genes up-regulated in comparison of effector  $CD8$  T cells versus memory  $CD8$  T cells (GOLDRATH); Genes down-regulated in comparison of effector memory T cells versus central memory T cells from peripheral blood mononuclear cells (PBMC) (GSE11057); Genes up-regulated in comparison of effective memory  $CD4$  T cells versus Th1 cells (GSE3982); Genes up-regulated in comparison of T follicular helper (Tfh) cells versus Th17 cells (GSE11924). **c.** Differential expression analysis on leukocyte-rich RA ( $n=18$ ) comparing with OA ( $n=13$ ) on sorted T cell samples revealed that *CXCL13*, *NFKBID*, *NFKBIZ*, and *NR4A2* are significantly upregulated in leukocyte-rich RA. \*\*\*\* $p \leq 1e-4$ , \*\*\* $p \leq 1e-3$ , \*\* $p \leq 1e-2$ . **d.** Disease association of single-cell RNA-seq clusters by aggregating top markers ( $AUC > 0.7$ ) by comparing leukocyte-rich RA with OA using bulk RNA-seq. Tph/Tfh cells (SC-T4) are upregulated (two-tailed Student's  $t$ -test  $p=0.01$ ,  $t$ -value=2.73,  $df=29.00$ ) in leukocyte-rich RA. **e.** Mass cytometry analysis by DensVM revealed nine T cell subpopulations. **f-g.** Distinct pattern of protein markers that used to define these clusters. **h.** Integration of identified mass cytometry clusters with bulk RNA-seq using CCA reveals bulk genes that are associated with  $CD4^+ PD-1^+ ICOS^+$  and  $CD8^+ PD-1^- HLA-DR^+$  by mass cytometry. **i.** Integration of mass cytometry clusters with single-cell RNA-seq clusters by taking the average of the top markers ( $AUC > 0.7$ ) for each single-cell RNA-seq cluster in the top 10 canonical variates. Z-score based on permutation test reveals that  $CD4^+ PD-1^+ ICOS^+$  and  $CD8^+ PD-1^- HLA-DR^+$  by mass cytometry are highly associated with Tph/Tfh (SC-T3) by single-cell RNA-seq;  $CD8^+ PD-1^- HLA-DR^+$  T cells by mass cytometry are highly associated with  $CD8^+$  T cells (SC-T4, SC-T5, and SC-T6).

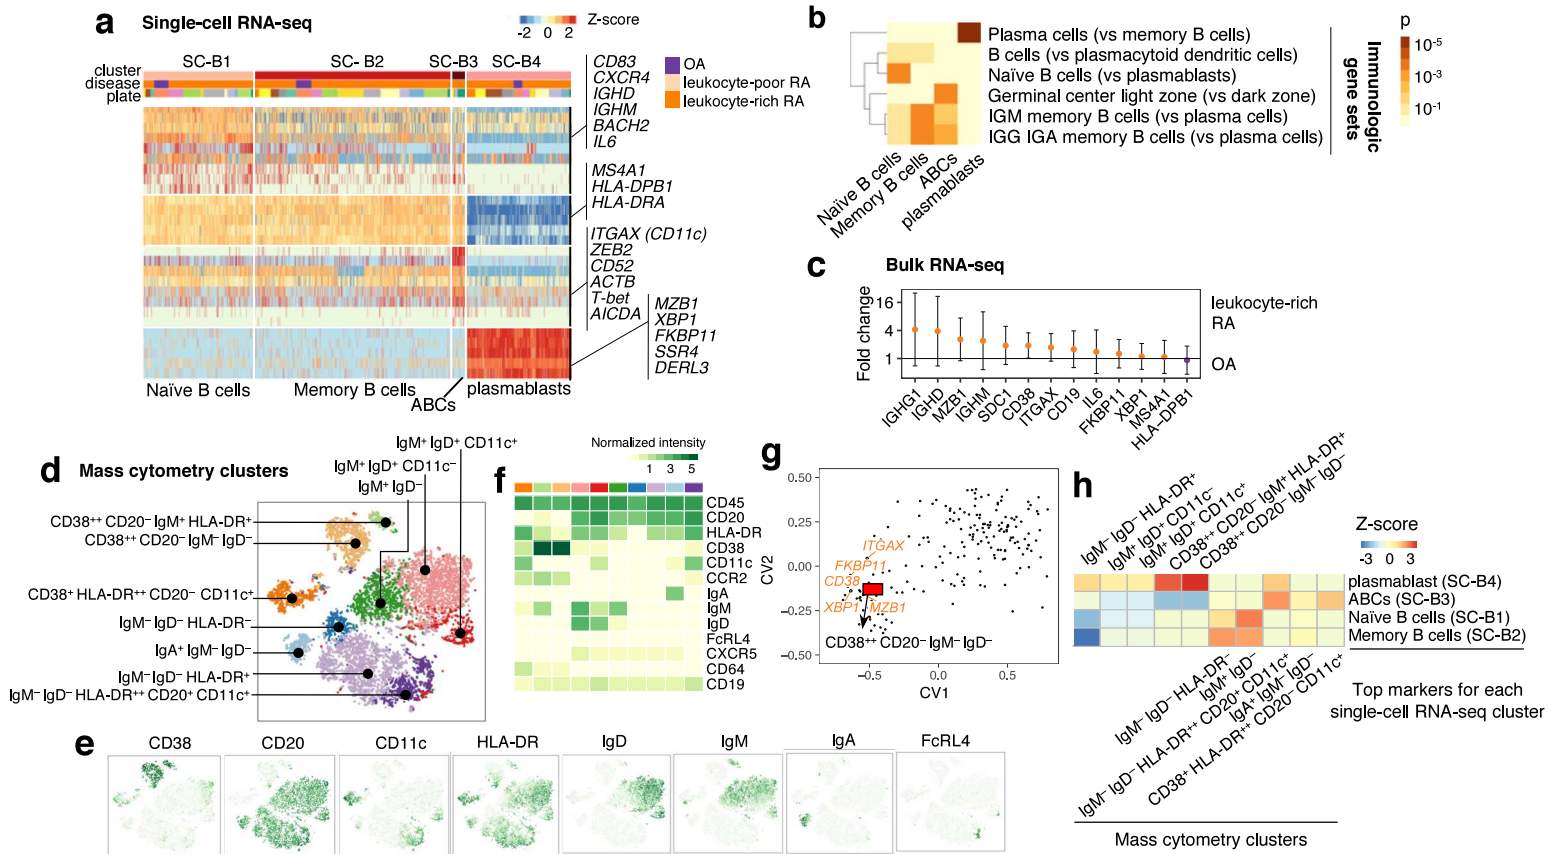

**Fig. 7.** Synovial B cells display heterogeneous subpopulations in RA synovium. **a.** Single-cell RNA-seq analysis identified naïve B cells (SC-B1), memory B cells (SC-B2), autoimmune-associated B cells (ABCs) (SC-B3), and plasmablasts (SC-B4). **b.** Pathway enrichment analysis using immunologic gene sets indicates the distinct enriched pathways for each single-cell RNA-seq cluster. The standard names for the immunological gene sets from up to bottom are: Genes up-regulated in plasma cells versus memory B cells (GSE12366); Genes up-regulated in comparison of B cells versus plasmacytoid dendritic cells (pDC) (GSE29618); Genes up-regulated in B lymphocytes: naïve versus plasmablasts (GSE42724); Genes up-regulated in B lymphocytes: human germinal center light zone versus dark zone (GSE38697); Genes up-regulated in comparison of memory IgM B cells versus plasma cells from bone marrow and blood (GSE22886); Genes up-regulated in comparison of memory IGG and IGA B cells versus plasma cells from bone marrow and blood (GSE22886). **c.** Differential expression analysis by comparing leukocyte-rich RA (n=16) with OA (n=7) by bulk RNA-seq. **d.** Mass cytometry data analysis identified ten clusters by DensVM. **e-f.** Distinct expression patterns of protein markers that used to define these clusters. **g.** Integrating mass cytometry clusters with bulk RNA-seq data using CCA shows that CD38<sup>+</sup> CD20<sup>-</sup> Ig<sup>-</sup> (plasmablasts) is highly associated with gene expression of plasma cells makers, like *XBP1*. **h.** Integration of mass cytometry clusters with single-cell RNA-seq clusters suggested that CD38<sup>+</sup> CD20<sup>-</sup> Ig<sup>+</sup> and CD38<sup>+</sup> CD20<sup>-</sup> Ig<sup>-</sup> are significantly associated with plasmablast (SC-B4); HLA-DR<sup>high</sup> CD20<sup>+</sup> CD11c<sup>+</sup> B cells are associated with ABCs (SC-B3).

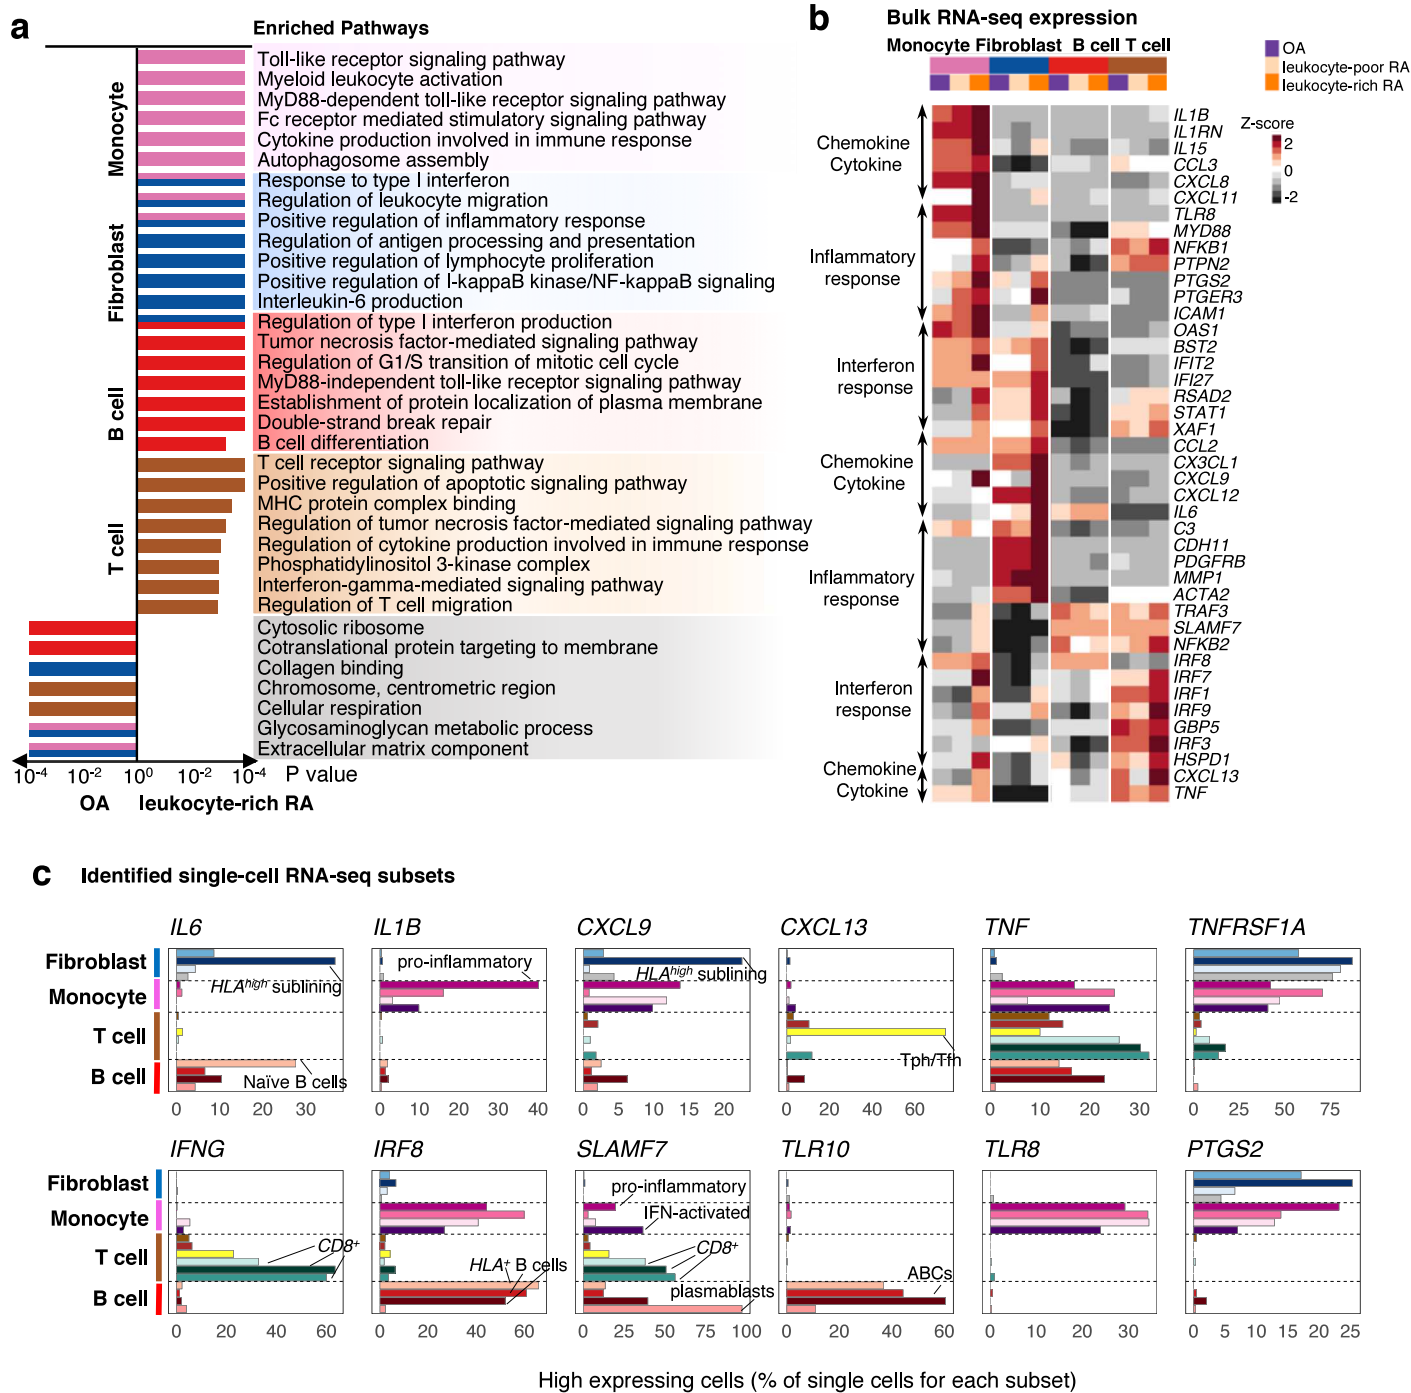

**Fig. 8.** Transcriptomic profiling of synovial cells reveal upregulation of inflammatory pathways in RA synovium. **a.** Pathway enrichment driven by PCA analysis and differential expression analysis using bulk RNA-seq identified shared and unique inflammatory response pathways for each cell type. **b.** Bulk RNA-seq profiling of genes obtained from the significantly enriched pathways from (a) shows the averaged gene expression from different disease cohorts (OA, leukocyte-poor RA, and leukocyte-rich RA) normalized across all cell type samples. **c.** Single-cell RNA-seq profiling resolved that inflammatory cytokines/chemokines, interferon responsive, and inflammatory responsive genes were driven by a global upregulation within a synovial cell type or discrete cell states.



**Table 1.** Connection between cell populations determined by mass cytometry and scRNA-seq clusters and disease associations.

| scRNA-seq cluster                                                                               | mass cytometry cluster                                                                        | leukocyte-poor | leukocyte-rich | One tailed     | leukocyte-rich           |
|-------------------------------------------------------------------------------------------------|-----------------------------------------------------------------------------------------------|----------------|----------------|----------------|--------------------------|
|                                                                                                 |                                                                                               | RA and OA      | RA             | MASC p value   | OR (CI)                  |
| Lining (SC-F4)                                                                                  | THY1 <sup>-</sup> Cadherin11 <sup>-</sup>                                                     | 21%            | 4%             | 1.00           | 0.04 (0-0.2)             |
|                                                                                                 | THY1 <sup>-</sup> Cadherin11 <sup>+</sup>                                                     | 18%            | 2%             | 1.00           | 0.1 (0-0.3)              |
|                                                                                                 | THY1 <sup>-</sup> CD34 <sup>+</sup> HLA-DR <sup>high</sup>                                    | 7%             | 3%             | 0.87           | 0.5 (0.3-1.2)            |
|                                                                                                 | THY1 <sup>-</sup> CD34 <sup>-</sup> HLA-DR <sup>high</sup>                                    | 17%            | 15%            | 0.48           | 1.2 (0.3-4.4)            |
| <i>HLA<sup>high</sup></i> sublining (SC-F2)                                                     | <b>THY1<sup>+</sup> CD34<sup>-</sup> HLA-DR<sup>high</sup></b>                                | <b>2%</b>      | <b>36%</b>     | <b>1.9E-05</b> | <b>33.8 (11.7-113.1)</b> |
| <i>DKK3<sup>+</sup></i> sublining (SC-F3)                                                       | THY1 <sup>+</sup> CD34 <sup>-</sup> HLA-DR <sup>low</sup>                                     | 16%            | 15%            | 0.66           | 0.8 (0.3-1.8)            |
| <i>CD34<sup>+</sup></i> sublining (SC-F1)                                                       | THY1 <sup>+</sup> CD34 <sup>+</sup> HLA-DR <sup>low</sup>                                     | 18%            | 4%             | 1.00           | 0.2 (0.1-0.4)            |
|                                                                                                 | <b>THY1<sup>+</sup> CD34<sup>+</sup> HLA-DR<sup>high</sup></b>                                | <b>2%</b>      | <b>21%</b>     | <b>1.6E-04</b> | <b>25.5 (7.5-101.8)</b>  |
| <i>NUPR1<sup>+</sup></i> (SC-M2)                                                                | CD11c <sup>-</sup>                                                                            | 30%            | 4%             | 1.00           | 0.1 (0-0.4)              |
| <i>IL1B<sup>+</sup></i> (SC-M1), IFN-activated (SC-M4)                                          | CD11c <sup>+</sup> CCR2 <sup>+</sup>                                                          | 34%            | 40%            | 0.23           | 1.6 (0.7-3.6)            |
|                                                                                                 | CD11c <sup>+</sup> CD38 <sup>-</sup>                                                          | 13%            | 2%             | 1.00           | 0.1 (0-0.3)              |
|                                                                                                 | CD11c <sup>+</sup> CD38 <sup>-</sup> CD64 <sup>+</sup>                                        | 13%            | 3%             | 0.93           | 0.3 (0.1-1)              |
| <i>IL1B<sup>+</sup></i> (SC-M1), IFN-activated (SC-M4), <i>C1QA<sup>+</sup></i> (SC-M3)         | <b>CD11c<sup>+</sup> CD38<sup>+</sup></b>                                                     | <b>15%</b>     | <b>51%</b>     | <b>6.7E-05</b> | <b>7.8 (3.6-17.2)</b>    |
| <i>CCR7<sup>+</sup></i> (SC-T2)                                                                 | CD4 <sup>-</sup> CD8 <sup>-</sup>                                                             | 15%            | 9%             | 0.95           | 0.6 (0.3-1)              |
|                                                                                                 | CD4 <sup>+</sup> CCR2 <sup>+</sup>                                                            | 26%            | 13%            | 1.00           | 0.4 (0.2-0.7)            |
|                                                                                                 | CD4 <sup>+</sup> HLA-DR <sup>+</sup>                                                          | 6%             | 2%             | 0.83           | 0.7 (0.2-4.1)            |
|                                                                                                 | CD4 <sup>+</sup> PD-1 <sup>+</sup> ICOS <sup>-</sup>                                          | 13%            | 12%            | 0.81           | 0.9 (0.5-1.6)            |
| Tph/Tfh (SC-T4)                                                                                 | <b>CD4<sup>+</sup> PD-1<sup>+</sup> ICOS<sup>+</sup></b>                                      | <b>11%</b>     | <b>25%</b>     | <b>2.7E-04</b> | <b>3.0 (1.7-5.2)</b>     |
| <i>GZMK<sup>+</sup>/GZMB<sup>+</sup></i> (SC-T7), <i>GZMK<sup>+</sup></i> (SC-T5), CTLs (SC-T6) | CD8 <sup>+</sup> PD-1 <sup>-</sup> HLA-DR <sup>-</sup>                                        | 14%            | 9%             | 0.76           | 0.7 (0.3-1.5)            |
|                                                                                                 | CD8 <sup>+</sup> PD-1 <sup>-</sup> HLA-DR <sup>+</sup>                                        | 2%             | 1%             | 0.64           | 0.9 (0.4-2.2)            |
|                                                                                                 | CD8 <sup>+</sup> PD-1 <sup>+</sup> HLA-DR <sup>-</sup>                                        | 13%            | 14%            | 0.40           | 1.1 (0.6-1.9)            |
| Tph/Tfh (SC-T4)                                                                                 | <b>CD8<sup>+</sup> PD-1<sup>+</sup> HLA-DR<sup>+</sup></b>                                    | <b>1%</b>      | <b>15%</b>     | <b>9.2E-05</b> | <b>11.8 (4.9-34.2)</b>   |
| plasmablasts (SC-B4)                                                                            | <b>CD38<sup>++</sup> CD20<sup>-</sup> IgM<sup>-</sup> IgD<sup>-</sup></b>                     | <b>6%</b>      | <b>12%</b>     | <b>0.01</b>    | <b>3.3 (1.2-10.5)</b>    |
|                                                                                                 | <b>CD38<sup>++</sup> CD20<sup>-</sup> IgM<sup>+</sup> HLA-DR<sup>+</sup></b>                  | <b>1%</b>      | <b>3%</b>      | <b>0.01</b>    | <b>6.9 (1.3-83.1)</b>    |
| Memory B cells (SC-B2)                                                                          | IgM <sup>-</sup> IgD <sup>-</sup> HLA-DR <sup>-</sup>                                         | 27%            | 2%             | 1.00           | 0.1 (0-0.3)              |
|                                                                                                 | CD38 <sup>+</sup> HLA-DR <sup>++</sup> CD20 <sup>-</sup> CD11c <sup>+</sup>                   | 19%            | 6%             | 0.56           | 0.9 (0.1-6.7)            |
| ABCs (SC-B3)                                                                                    | <b>IgM<sup>-</sup> IgD<sup>-</sup> HLA-DR<sup>++</sup> CD20<sup>+</sup> CD11c<sup>+</sup></b> | <b>4%</b>      | <b>12%</b>     | <b>2.7E-03</b> | <b>5.7 (1.8-22.3)</b>    |
|                                                                                                 | IgM <sup>-</sup> IgD <sup>-</sup> HLA-DR <sup>+</sup>                                         | 32%            | 20%            | 0.98           | 0.4 (0.2-1)              |
|                                                                                                 | IgA <sup>+</sup> IgM <sup>-</sup> IgD <sup>-</sup>                                            | 5%             | 4%             | 0.68           | 0.9 (0.5-1.6)            |
| Naïve B cells (SC-B1)                                                                           | IgM <sup>+</sup> IgD <sup>-</sup>                                                             | 22%            | 11%            | 0.97           | 0.5 (0.2-1)              |
|                                                                                                 | IgM <sup>+</sup> IgD <sup>+</sup> CD11c <sup>-</sup>                                          | 12%            | 26%            | 0.02           | 4.0 (1.3-12.0)           |
|                                                                                                 | IgM <sup>+</sup> IgD <sup>+</sup> CD11c <sup>+</sup>                                          | 4%             | 7%             | 0.14           | 2.2 (0.74 - 7.7)         |

Bold mass cytometry clusters are significantly enriched in leukocyte-rich RA (one tailed FDR q value < 0.05).

Two significant digits are given to the one tailed MASC p value.

95% confidence interval (CI) for the odds ratio (OR) is given for each mass cytometry cluster.

Where possible, we have identified the most similar scRNA-seq clusters for each cluster found by mass cytometry.
